# Supplementary material for: miRNA-221 and miRNA-483-3p Dysregulation Correlated with Poor Survival in Esophageal Adenocarcinoma
Source: Preprints.org preprint supplement (doi:10.20944/preprints202312.0734.v1), 2023-12-11
Supplement: Supplementary file 1 [file supplementary]

## Sheet: Table S1
EAC sample	Sex (M=0 F=1)	Age	CSS (1=Death	Follow-up (months)	Stage	Higher Risk (H) / Lower Risk (L)
			0=Alive)
EAC 1	1	53	0	78	2	L
EAC 3	1	76	1	1	3	H
EAC 4	0	66	1	42	2	L
EAC 6	1	82	0	96	3	L
EAC 7	0	83	0	27	3	L
EAC 8	0	86	1	19	3	H
EAC 9	0	62	1	9	3	H
EAC 11	0	76	1	12	3	H
EAC 12	0	58	0	65	3	L
EAC 13	1	28	1	22	4	L
EAC 14	1	83	1	0	3	L
EAC 15	1	60	0	96	2	L
EAC 16	0	78	1	42	2	H
EAC 17	0	59	0	30	2	L
EAC 18	0	75	1	8	3	H
EAC 19	1	44	1	41	3	H
EAC 20	0	79	1	0	4	H
EAC 21	1	80	0	86	1	L
EAC 22	0	84	1	84	2	L
EAC 23	1	72	1	70	3	L
EAC 25	1	62	0	110	1	H
EAC 26	0	74	0	19	3	H
EAC 27	0	68	0	0	3	L
EAC 28	0	72	0	18	3	H
EAC 29	0	67	0	26	2	L
EAC 30	0	82	0	20	3	L
EAC 31	0	66	1	39	3	L
EAC 32	0	54	1	15	3	H
EAC 33	0	87	0	0	2	L
EAC 34	0	61	1	18	3	H
EAC 35	1	82	1	12	4	L
EAC 36	0	65	1	35	3	L
EAC 38	1	54	0	18	2	L
EAC 39	1	75	1	51	4	L
EAC 40	0	77	1	66	4	H
EAC 41	0	75	0	16	1	H
EAC 43	1	70	1	54	3	H
EAC 44	0	66	1	21	3	H
EAC 45	1	54	1	18	4	H
EAC 46	0	73	1	24	1	H
EAC 37	0	62	1	11	2	L
EAC 47	0	70	0	6	3	L
EAC 48	0	71	1	10	3	H
EAC 49	0	77	1	28	3	H
EAC 50	0	69	1	8	3	H
EAC 51	0	68	0	0	3	H
EAC 52	0	70	0	7	1	L
EAC 53	0	57	1	12	4	L
EAC 54	0	72	0	19	3	H
EAC 55	0	80	0	4	3	H
EAC 56	1	76	1	16	2	L
EAC 57	0	69	0	19	4	H
EAC 58	0	65	0	17	4	L
EAC 59	1	80	0	0	3	H
EAC 60	0	75	0	47	3	L
EAC 61	0	82	1	26	3	L
EAC 62	1	58	0	27	2	L
EAC 63	0	72	0	65	3	L
EAC 64	0	72	0	29	3	L
EAC 65	0	63	0	36	1
EAC 66	0	83	0	18	1
EAC 67	1	67	0	29	1
EAC 68	0	66	0	31	1
EAC 69	0	63	0	38	1
EAC 70	0	62	0	58	1
EAC 71	0	52	0	57	1
EAC 72	1	60	0	41	1
EAC 73	0	66	0	84	1
EAC 74	1	83	0	6	1
EAC 75	0	72	1	0	3
EAC 76	1	80	0	97	1	H
EAC 78	0	71	1	30.88	3
EAC 79	0	57	1	28.71	3
EAC 80	0	78	1	10.8	4
EAC 81	0	70	0	29.47	3
EAC 82	0	55	0	29.86	3
EAC 83	0	67	0	57.2	3
EAC 84	0	68	0	9.63	3
EAC 85	0	82.29	0	23.98	2
EAC 86	0	46.74	0	24.84	2
EAC 87	0	47.55	0	27.99	3
EAC 88	0	60	0	48.72	2	H
EAC 89	0	73	0	62.23	4	L
EAC 90	0	79	0	47.8	2	L
EAC 91	0	41	1	32.85	3	L
EAC 92	1	51	1	62.16	2	L
EAC 94	1	62	1	46.09	2	H
EAC 95	1	45	1	15.7	3	L
EAC 96	0	61	1	21.98	2	H
EAC 97	0	77	0	101.85	2	L
EAC 98	0	13	0	84.27	3	L
EAC 99	0	78	1	38.05	3	L
EAC 101	0	77	0	56.41	2	L
EAC 102	0	62	1	32.89	4	L
EAC 103	0	61	1	23.89	4	L
EAC 104	1	49	1	27.37	3	H
EAC 106	0	73	0	18.2	2	L
EAC 107	0	51	1	0.46	3	L
EAC 108	0	70	1	66.37	3	H
EAC 109	0	62	1	28.94	2	L
EAC 110	1	69	0	29.14	3	L
EAC 111	0	44	0	133.26	3	L
EAC 112	1	68	1	40.05	3	L
EAC 113	1	76	0	31.24	2	H
EAC 114	1	46	1	18	3	H
EAC 115	1	81	1	26	4	H
EAC 116	1	56	0	75	3	L
EAC 117	1	83	0	3	2	L
EAC 118	1	85	1	18	4	L
EAC 119	1	79	0	28	4	L
EAC 120	1	77	0	42	2	L
EAC 121	1	64	0	1	4	H
EAC 122	1	68	0	39	3	H
EAC 123	0	43	0	41	2	H
EAC 124	1	75	1	12	4	H
EAC 125	1	76	1	25	3	H
EAC 126	1	50	1	11	3	H
EAC 127	0	85	0	37	4	H
EAC 128	1	79	1	25	3	H
EAC 129	1	65	0	23	3	L
EAC 130	0	77	0	43	3	L
EAC 132	0	74	1	9	2	H
EAC 133	1	84	0	84	2	L
EAC 135	0	80	0	109	2	L

## Sheet: Table S2
	logFC	P.Value	adj.P.Val
ENSG00000251562_MALAT1	-1,85E+00	3,32E-55	8,40E-51
ENSG00000211459_MT-RNR1	-1,17E+00	1,37E-22	1,73E-18
ENSG00000210082_MT-RNR2	-5,12E-01	1,18E-06	9,26E-03
ENSG00000198712_MT-CO2	-5,12E-01	1,46E-06	9,26E-03
ENSG00000228253_MT-ATP8	-6,46E-01	7,73E-06	3,91E-02
ENSG00000274012_RN7SL2	-1,26E+00	1,47E-05	6,21E-02
ENSG00000248527_MTATP6P1	-5,70E-01	6,04E-05	1,94E-01
ENSG00000167995_BEST1	-7,28E-01	6,12E-05	1,94E-01
ENSG00000198899_MT-ATP6	-4,40E-01	1,04E-04	2,92E-01
ENSG00000198840_MT-ND3	-4,64E-01	2,00E-04	5,07E-01
ENSG00000273340_MICE	-4,42E+00	2,62E-04	6,03E-01
ENSG00000198804_MT-CO1	-3,63E-01	4,52E-04	9,37E-01
ENSG00000262228_AC087392.3	-3,99E+00	6,57E-04	9,37E-01
ENSG00000272440_AC080013.6	-3,66E+00	6,67E-04	9,37E-01
ENSG00000213064_SFT2D2	-5,38E-01	7,15E-04	9,37E-01
ENSG00000184270_HIST2H2AB	-3,27E+00	8,24E-04	9,37E-01
ENSG00000184357_HIST1H1B	-2,49E+00	8,47E-04	9,37E-01
ENSG00000234566_RPL7AP71	-4,05E+00	1,36E-03	9,37E-01
ENSG00000167910_CYP7A1	-4,05E+00	1,36E-03	9,37E-01
ENSG00000271394_RF00100	-4,05E+00	1,36E-03	9,37E-01
ENSG00000139985_ADAM21	-4,05E+00	1,36E-03	9,37E-01
ENSG00000235786_ZNRF3-IT1	-4,05E+00	1,36E-03	9,37E-01
ENSG00000259081_AF111169.3	-4,05E+00	1,36E-03	9,37E-01
ENSG00000262434_AC087392.4	-4,05E+00	1,36E-03	9,37E-01
ENSG00000198938_MT-CO3	-3,50E-01	1,57E-03	9,37E-01
ENSG00000198886_MT-ND4	-3,24E-01	1,70E-03	9,37E-01
ENSG00000167996_FTH1	-3,35E-01	2,02E-03	9,37E-01
ENSG00000230606_AC092683.1	-3,41E+00	2,06E-03	9,37E-01
ENSG00000260063_AL512408.1	-3,41E+00	2,06E-03	9,37E-01
ENSG00000285591_AC092617.1	-3,57E+00	2,26E-03	9,37E-01
ENSG00000102109_PCSK1N	-3,57E+00	2,26E-03	9,37E-01
ENSG00000276410_HIST1H2BB	-3,57E+00	2,26E-03	9,37E-01
ENSG00000119314_PTBP3	-4,08E-01	2,30E-03	9,37E-01
ENSG00000197714_ZNF460	-1,10E+00	3,08E-03	9,37E-01
ENSG00000245556_SCAMP1-AS1	4,02E+00	3,09E-03	9,37E-01
ENSG00000198740_ZNF652	-6,17E-01	3,14E-03	9,37E-01
ENSG00000188452_CERKL	-3,63E+00	3,16E-03	9,37E-01
ENSG00000252192_RF00411	-3,63E+00	3,16E-03	9,37E-01
ENSG00000114124_GRK7	-3,63E+00	3,16E-03	9,37E-01
ENSG00000229119_AC026403.1	4,05E+00	3,20E-03	9,37E-01
ENSG00000198763_MT-ND2	-3,19E-01	3,36E-03	9,37E-01
ENSG00000260086_AC007611.1	-3,04E+00	3,46E-03	9,37E-01
ENSG00000261485_PAN3-AS1	-2,11E+00	3,51E-03	9,37E-01
ENSG00000279089_AC005839.1	-2,26E+00	3,57E-03	9,37E-01
ENSG00000177954_RPS27	-4,04E-01	3,66E-03	9,37E-01
ENSG00000221539_SNORD99	-2,68E+00	3,67E-03	9,37E-01
ENSG00000238741_SCARNA7	-2,61E+00	3,85E-03	9,37E-01
ENSG00000254369_HOXA-AS3	-2,90E+00	3,96E-03	9,37E-01
ENSG00000090382_LYZ	-3,15E-01	4,14E-03	9,37E-01
ENSG00000283907_AD000090.1	-1,39E+00	4,23E-03	9,37E-01
ENSG00000163075_CFAP221	-3,10E+00	4,40E-03	9,37E-01
ENSG00000226954_AL023802.1	-3,10E+00	4,40E-03	9,37E-01
ENSG00000184313_MROH7	-2,52E+00	4,59E-03	9,37E-01
ENSG00000124743_KLHL31	-1,34E+00	4,92E-03	9,37E-01
ENSG00000145425_RPS3A	-3,82E-01	5,13E-03	9,37E-01
ENSG00000229989_MIR181A1HG	-2,37E+00	5,16E-03	9,37E-01
ENSG00000231181_AL954705.1	-2,69E+00	5,30E-03	9,37E-01
ENSG00000170989_S1PR1	-2,50E+00	6,08E-03	9,37E-01
ENSG00000254996_ANKHD1-EIF4EBP3	-2,50E+00	6,08E-03	9,37E-01
ENSG00000133112_TPT1	-3,11E-01	6,33E-03	9,37E-01
ENSG00000262766_AC135050.5	-2,43E+00	6,42E-03	9,37E-01
ENSG00000264235_AP005329.1	-1,63E+00	6,44E-03	9,37E-01
ENSG00000142534_RPS11	-3,43E-01	6,49E-03	9,37E-01
ENSG00000270878_AL136038.4	-3,12E+00	6,70E-03	9,37E-01
ENSG00000247570_SDCBPP2	-3,12E+00	6,70E-03	9,37E-01
ENSG00000196218_RYR1	3,72E+00	6,72E-03	9,37E-01
ENSG00000197956_S100A6	-3,37E-01	6,90E-03	9,37E-01
ENSG00000250479_CHCHD10	5,44E-01	7,05E-03	9,37E-01
ENSG00000271853_AL162258.1	-3,57E+00	7,26E-03	9,37E-01
ENSG00000105605_CACNG7	-3,57E+00	7,26E-03	9,37E-01
ENSG00000202324_RNA5SP366	-3,57E+00	7,26E-03	9,37E-01
ENSG00000271664_AC004890.3	-3,57E+00	7,26E-03	9,37E-01
ENSG00000213539_YBX1P6	-3,57E+00	7,26E-03	9,37E-01
ENSG00000285142_AC006927.5	-3,57E+00	7,26E-03	9,37E-01
ENSG00000120262_CCDC170	-3,57E+00	7,26E-03	9,37E-01
ENSG00000230176_LINC01433	-3,57E+00	7,26E-03	9,37E-01
ENSG00000231966_AL359853.2	-3,57E+00	7,26E-03	9,37E-01
ENSG00000280449_AC034229.6	-3,57E+00	7,26E-03	9,37E-01
ENSG00000237810_AC104852.1	-3,57E+00	7,26E-03	9,37E-01
ENSG00000218596_AL162578.1	-3,57E+00	7,26E-03	9,37E-01
ENSG00000130561_SAG	-3,57E+00	7,26E-03	9,37E-01
ENSG00000242327_AC023906.1	-3,57E+00	7,26E-03	9,37E-01
ENSG00000275386_AC105081.1	-3,57E+00	7,26E-03	9,37E-01
ENSG00000207352_RNU6-540P	-3,57E+00	7,26E-03	9,37E-01
ENSG00000229628_AC073115.1	-3,57E+00	7,26E-03	9,37E-01
ENSG00000279977_AC008764.10	-3,57E+00	7,26E-03	9,37E-01
ENSG00000217929_CICP18	-3,57E+00	7,26E-03	9,37E-01
ENSG00000255670_AC007619.1	-3,57E+00	7,26E-03	9,37E-01
ENSG00000279000_OR10A6	-3,57E+00	7,26E-03	9,37E-01
ENSG00000172752_COL6A5	-3,57E+00	7,26E-03	9,37E-01
ENSG00000285085_AL662884.4	-3,57E+00	7,26E-03	9,37E-01
ENSG00000248377_HMGN1P9	-3,57E+00	7,26E-03	9,37E-01
ENSG00000249020_SNORA58	-3,57E+00	7,26E-03	9,37E-01
ENSG00000267336_EIF4A2P1	-3,57E+00	7,26E-03	9,37E-01
ENSG00000244731_C4A	-3,57E+00	7,26E-03	9,37E-01
ENSG00000232754_AL035658.1	-3,57E+00	7,26E-03	9,37E-01
ENSG00000243777_AP000942.1	-3,57E+00	7,26E-03	9,37E-01
ENSG00000274372_AC239803.3	-3,57E+00	7,26E-03	9,37E-01
ENSG00000252397_RNU5A-4P	-3,57E+00	7,26E-03	9,37E-01
ENSG00000204904_LINC01545	-3,57E+00	7,26E-03	9,37E-01
ENSG00000204909_SPINK9	-3,57E+00	7,26E-03	9,37E-01
ENSG00000250001_AC027335.1	-3,57E+00	7,26E-03	9,37E-01
ENSG00000281909_HERC2P7	-3,57E+00	7,26E-03	9,37E-01
ENSG00000196862_RGPD4	-3,57E+00	7,26E-03	9,37E-01
ENSG00000261707_AC092134.1	-3,57E+00	7,26E-03	9,37E-01
ENSG00000258779_LINC01568	-3,57E+00	7,26E-03	9,37E-01
ENSG00000231241_RPS3AP3	-3,57E+00	7,26E-03	9,37E-01
ENSG00000175175_PPM1E	-3,57E+00	7,26E-03	9,37E-01
ENSG00000201649_RNY4P34	-3,57E+00	7,26E-03	9,37E-01
ENSG00000225222_CHCHD4P5	-3,57E+00	7,26E-03	9,37E-01
ENSG00000186226_LCE1E	-3,57E+00	7,26E-03	9,37E-01
ENSG00000136040_PLXNC1	-3,57E+00	7,26E-03	9,37E-01
ENSG00000267114_AC011481.1	-3,57E+00	7,26E-03	9,37E-01
ENSG00000264607_MIR3173	-3,57E+00	7,26E-03	9,37E-01
ENSG00000227409_ZMYM4-AS1	-3,57E+00	7,26E-03	9,37E-01
ENSG00000254187_AC008708.2	-3,57E+00	7,26E-03	9,37E-01
ENSG00000254181_SLC25A51P3	-3,57E+00	7,26E-03	9,37E-01
ENSG00000230537_AL158071.2	-3,57E+00	7,26E-03	9,37E-01
ENSG00000272854_AC004839.1	-3,57E+00	7,26E-03	9,37E-01
ENSG00000274719_AC012653.2	-3,57E+00	7,26E-03	9,37E-01
ENSG00000034053_APBA2	-3,57E+00	7,26E-03	9,37E-01
ENSG00000225026_AC091492.1	-3,57E+00	7,26E-03	9,37E-01
ENSG00000204399_AC012306.1	-3,57E+00	7,26E-03	9,37E-01
ENSG00000137745_MMP13	-3,57E+00	7,26E-03	9,37E-01
ENSG00000254238_AC100782.1	-3,57E+00	7,26E-03	9,37E-01
ENSG00000252641_RNU6-678P	-3,57E+00	7,26E-03	9,37E-01
ENSG00000285840_AL353648.1	-3,57E+00	7,26E-03	9,37E-01
ENSG00000270048_AC068790.4	-3,57E+00	7,26E-03	9,37E-01
ENSG00000274341_AC005899.6	-3,57E+00	7,26E-03	9,37E-01
ENSG00000205918_PDPK2P	-3,57E+00	7,26E-03	9,37E-01
ENSG00000274976_AC087588.2	-3,57E+00	7,26E-03	9,37E-01
ENSG00000120217_CD274	-3,57E+00	7,26E-03	9,37E-01
ENSG00000273013_AC117490.2	-3,57E+00	7,26E-03	9,37E-01
ENSG00000272986_AC009570.1	-3,57E+00	7,26E-03	9,37E-01
ENSG00000227218_AL157935.1	-3,57E+00	7,26E-03	9,37E-01
ENSG00000264272_AC100786.1	-3,57E+00	7,26E-03	9,37E-01
ENSG00000230039_AL450487.1	-3,57E+00	7,26E-03	9,37E-01
ENSG00000159339_PADI4	-3,57E+00	7,26E-03	9,37E-01
ENSG00000275709_AC090527.3	-3,57E+00	7,26E-03	9,37E-01
ENSG00000117600_PLPPR4	-3,57E+00	7,26E-03	9,37E-01
ENSG00000274294_AC015660.3	-3,57E+00	7,26E-03	9,37E-01
ENSG00000283016_AL139353.3	-3,57E+00	7,26E-03	9,37E-01
ENSG00000100191_SLC5A4	-3,57E+00	7,26E-03	9,37E-01
ENSG00000213739_PPIAP68	-3,57E+00	7,26E-03	9,37E-01
ENSG00000164796_CSMD3	-3,57E+00	7,26E-03	9,37E-01
ENSG00000259039_AL161804.1	-3,57E+00	7,26E-03	9,37E-01
ENSG00000121858_TNFSF10	-3,57E+00	7,26E-03	9,37E-01
ENSG00000188996_HUS1B	-3,57E+00	7,26E-03	9,37E-01
ENSG00000234969_AL627389.1	-3,57E+00	7,26E-03	9,37E-01
ENSG00000222578_RNA5SP345	-3,57E+00	7,26E-03	9,37E-01
ENSG00000229372_SZT2-AS1	-3,57E+00	7,26E-03	9,37E-01
ENSG00000232536_AL365436.2	-3,57E+00	7,26E-03	9,37E-01
ENSG00000212128_TAS2R13	-3,57E+00	7,26E-03	9,37E-01
ENSG00000255159_AC026894.1	-3,57E+00	7,26E-03	9,37E-01
ENSG00000198729_PPP1R14C	-3,57E+00	7,26E-03	9,37E-01
ENSG00000276712_MIR7111	-3,57E+00	7,26E-03	9,37E-01
ENSG00000283562_IGHVIII-44	-3,57E+00	7,26E-03	9,37E-01
ENSG00000233446_AL691517.1	-3,57E+00	7,26E-03	9,37E-01
ENSG00000254788_CKLF-CMTM1	-3,57E+00	7,26E-03	9,37E-01
ENSG00000274225_AP001065.1	-3,57E+00	7,26E-03	9,37E-01
ENSG00000219992_AL391422.1	-3,57E+00	7,26E-03	9,37E-01
ENSG00000233250_AC233728.1	-3,57E+00	7,26E-03	9,37E-01
ENSG00000213013_RPS15AP36	-3,57E+00	7,26E-03	9,37E-01
ENSG00000227275_MTND6P10	-3,57E+00	7,26E-03	9,37E-01
ENSG00000228238_AL096803.1	-3,57E+00	7,26E-03	9,37E-01
ENSG00000234380_LINC01426	-3,57E+00	7,26E-03	9,37E-01
ENSG00000183598_HIST2H3D	-3,57E+00	7,26E-03	9,37E-01
ENSG00000228719_AL022313.2	-3,57E+00	7,26E-03	9,37E-01
ENSG00000241399_CD302	-3,57E+00	7,26E-03	9,37E-01
ENSG00000253796_AC104248.1	-3,57E+00	7,26E-03	9,37E-01
ENSG00000233367_AL133480.1	-3,57E+00	7,26E-03	9,37E-01
ENSG00000236434_AL162430.2	-3,57E+00	7,26E-03	9,37E-01
ENSG00000262213_AC144836.1	-3,57E+00	7,26E-03	9,37E-01
ENSG00000277801_AL138478.1	-3,57E+00	7,26E-03	9,37E-01
ENSG00000264853_AC011933.2	-3,57E+00	7,26E-03	9,37E-01
ENSG00000272282_LINC02084	-3,57E+00	7,26E-03	9,37E-01
ENSG00000101230_ISM1	-3,57E+00	7,26E-03	9,37E-01
ENSG00000225344_AL035252.1	-3,57E+00	7,26E-03	9,37E-01
ENSG00000259402_AC090515.5	-3,57E+00	7,26E-03	9,37E-01
ENSG00000131484_AC091132.1	-3,57E+00	7,26E-03	9,37E-01
ENSG00000224959_AC017002.1	-3,57E+00	7,26E-03	9,37E-01
ENSG00000283000_AL392046.2	-3,57E+00	7,26E-03	9,37E-01
ENSG00000256315_AP000462.2	-3,57E+00	7,26E-03	9,37E-01
ENSG00000257865_AC090022.1	-3,57E+00	7,26E-03	9,37E-01
ENSG00000257682_AC090503.1	-3,57E+00	7,26E-03	9,37E-01
ENSG00000275770_MIR6505	-3,57E+00	7,26E-03	9,37E-01
ENSG00000185631_AC017079.1	-3,57E+00	7,26E-03	9,37E-01
ENSG00000250130_AC090519.1	-3,57E+00	7,26E-03	9,37E-01
ENSG00000229880_IMMTP1	-3,57E+00	7,26E-03	9,37E-01
ENSG00000250306_AC091826.1	-3,57E+00	7,26E-03	9,37E-01
ENSG00000196262_PPIA	-3,46E-01	7,33E-03	9,37E-01
ENSG00000147604_RPL7	-3,33E-01	7,68E-03	9,37E-01
ENSG00000171790_SLFNL1	-2,71E+00	7,78E-03	9,37E-01
ENSG00000279520_AC093525.8	-2,70E+00	7,80E-03	9,37E-01
ENSG00000230510_PPP5D1	-2,70E+00	7,80E-03	9,37E-01
ENSG00000198673_FAM19A2	-2,85E+00	7,93E-03	9,37E-01
ENSG00000117586_TNFSF4	-2,85E+00	7,93E-03	9,37E-01
ENSG00000142676_RPL11	-3,33E-01	8,14E-03	9,37E-01
ENSG00000212907_MT-ND4L	-3,42E-01	8,48E-03	9,37E-01
ENSG00000285219_AL591485.1	-1,82E+00	8,81E-03	9,37E-01
ENSG00000255872_AL138752.2	-3,21E+00	8,90E-03	9,37E-01
ENSG00000266975_FARSA-AS1	-3,21E+00	8,90E-03	9,37E-01
ENSG00000244921_MTCYBP18	-3,21E+00	8,90E-03	9,37E-01
ENSG00000102962_CCL22	-3,21E+00	8,90E-03	9,37E-01
ENSG00000253525_AC104966.1	-3,21E+00	8,90E-03	9,37E-01
ENSG00000187546_AGMO	-3,21E+00	8,90E-03	9,37E-01
ENSG00000134463_ECHDC3	-3,21E+00	8,90E-03	9,37E-01
ENSG00000256651_AC006518.1	-3,21E+00	8,90E-03	9,37E-01
ENSG00000188921_HACD4	-3,21E+00	8,90E-03	9,37E-01
ENSG00000224347_SCEL-AS1	-3,21E+00	8,90E-03	9,37E-01
ENSG00000261215_AL162231.4	-3,21E+00	8,90E-03	9,37E-01
ENSG00000272707_AC046143.2	-3,21E+00	8,90E-03	9,37E-01
ENSG00000233932_CTXN2	-3,21E+00	8,90E-03	9,37E-01
ENSG00000257246_PHBP19	-3,21E+00	8,90E-03	9,37E-01
ENSG00000228150_AL357140.2	-3,21E+00	8,90E-03	9,37E-01
ENSG00000267808_AC018755.1	-3,21E+00	8,90E-03	9,37E-01
ENSG00000143195_ILDR2	-2,14E+00	9,25E-03	9,37E-01
ENSG00000247950_SEC24B-AS1	-2,47E+00	9,29E-03	9,37E-01
ENSG00000273149_AL138963.3	-5,47E-01	9,41E-03	9,37E-01
ENSG00000125868_DSTN	-3,10E-01	9,74E-03	9,37E-01

## Sheet: Table S3
	logFC	P.Value	adj.P.Val
ENSG00000251562_MALAT1	-3,10E+00	3,52E-21	8,30E-17
ENSG00000211459_MT-RNR1	-1,30E+00	5,19E-13	6,11E-09
ENSG00000115053_NCL	-5,04E-01	9,07E-10	7,13E-06
ENSG00000187514_PTMA	-6,04E-01	4,73E-09	2,79E-05
ENSG00000184956_MUC6	-1,09E+00	1,12E-08	5,28E-05
ENSG00000117523_PRRC2C	-6,51E-01	2,95E-08	1,16E-04
ENSG00000148773_MKI67	-5,28E-01	5,15E-08	1,73E-04
ENSG00000117983_MUC5B	-6,13E-01	1,01E-07	2,77E-04
ENSG00000274012_RN7SL2	-2,42E+00	1,06E-07	2,77E-04
ENSG00000065978_YBX1	-4,41E-01	1,22E-07	2,83E-04
ENSG00000125944_HNRNPR	-5,69E-01	1,32E-07	2,83E-04
ENSG00000105323_HNRNPUL1	-4,47E-01	1,92E-07	3,78E-04
ENSG00000092199_HNRNPC	-4,75E-01	3,56E-07	6,44E-04
ENSG00000164032_H2AFZ	6,20E-01	4,60E-07	7,36E-04
ENSG00000089248_ERP29	-6,39E-01	4,68E-07	7,36E-04
ENSG00000125844_RRBP1	-3,34E-01	6,28E-07	9,24E-04
ENSG00000123144_TRIR	-8,58E-01	7,30E-07	1,01E-03
ENSG00000161395_PGAP3	3,85E-01	8,99E-07	1,15E-03
ENSG00000108518_PFN1	-4,77E-01	9,26E-07	1,15E-03
ENSG00000167460_TPM4	-3,48E-01	1,03E-06	1,21E-03
ENSG00000122566_HNRNPA2B1	-3,69E-01	1,12E-06	1,26E-03
ENSG00000003056_M6PR	-7,53E-01	1,47E-06	1,58E-03
ENSG00000123200_ZC3H13	-6,00E-01	1,64E-06	1,68E-03
ENSG00000167548_KMT2D	-4,41E-01	2,10E-06	2,06E-03
ENSG00000160818_GPATCH4	-6,78E-01	2,59E-06	2,36E-03
ENSG00000161013_MGAT4B	5,98E-01	2,61E-06	2,36E-03
ENSG00000143321_HDGF	-3,38E-01	2,93E-06	2,56E-03
ENSG00000196139_AKR1C3	3,49E-01	3,34E-06	2,81E-03
ENSG00000147403_RPL10	4,82E-01	3,66E-06	2,97E-03
ENSG00000137309_HMGA1	-3,03E-01	4,12E-06	3,17E-03
ENSG00000141867_BRD4	-6,47E-01	4,17E-06	3,17E-03
ENSG00000110955_ATP5F1B	4,22E-01	4,35E-06	3,17E-03
ENSG00000175164_ABO	-5,82E-01	4,44E-06	3,17E-03
ENSG00000130254_SAFB2	-7,97E-01	5,03E-06	3,49E-03
ENSG00000198740_ZNF652	-1,04E+00	5,52E-06	3,68E-03
ENSG00000107223_EDF1	-5,93E-01	5,92E-06	3,68E-03
ENSG00000072274_TFRC	3,34E-01	6,11E-06	3,68E-03
ENSG00000167491_GATAD2A	-5,77E-01	6,21E-06	3,68E-03
ENSG00000110719_TCIRG1	7,17E-01	6,32E-06	3,68E-03
ENSG00000159335_PTMS	-5,85E-01	6,48E-06	3,68E-03
ENSG00000133226_SRRM1	-6,19E-01	6,48E-06	3,68E-03
ENSG00000163399_ATP1A1	2,87E-01	6,55E-06	3,68E-03
ENSG00000083845_RPS5	4,70E-01	7,22E-06	3,77E-03
ENSG00000014641_MDH1	6,93E-01	7,24E-06	3,77E-03
ENSG00000140319_SRP14	-5,73E-01	7,36E-06	3,77E-03
ENSG00000096746_HNRNPH3	-5,14E-01	7,36E-06	3,77E-03
ENSG00000107581_EIF3A	-4,02E-01	9,77E-06	4,82E-03
ENSG00000149925_ALDOA	-1,36E+00	9,89E-06	4,82E-03
ENSG00000284797_AC008397.1	-1,15E+00	1,02E-05	4,82E-03
ENSG00000188112_C6orf132	-4,48E-01	1,02E-05	4,82E-03
ENSG00000117450_PRDX1	3,89E-01	1,18E-05	5,25E-03
ENSG00000110367_DDX6	-5,24E-01	1,19E-05	5,25E-03
ENSG00000126653_NSRP1	-8,53E-01	1,19E-05	5,25E-03
ENSG00000090273_NUDC	-4,76E-01	1,22E-05	5,25E-03
ENSG00000145920_CPLX2	-6,32E-01	1,23E-05	5,25E-03
ENSG00000136938_ANP32B	-3,91E-01	1,26E-05	5,32E-03
ENSG00000130770_ATP5IF1	-8,30E-01	1,39E-05	5,69E-03
ENSG00000106244_PDAP1	-5,25E-01	1,40E-05	5,69E-03
ENSG00000197746_PSAP	4,32E-01	1,47E-05	5,79E-03
ENSG00000248527_MTATP6P1	-7,48E-01	1,47E-05	5,79E-03
ENSG00000197714_ZNF460	-2,06E+00	1,51E-05	5,84E-03
ENSG00000105810_CDK6	-3,94E-01	1,56E-05	5,93E-03
ENSG00000125686_MED1	-7,12E-01	1,60E-05	5,99E-03
ENSG00000070756_PABPC1	-3,20E-01	1,71E-05	6,23E-03
ENSG00000105357_MYH14	-4,84E-01	1,72E-05	6,23E-03
ENSG00000169045_HNRNPH1	-3,68E-01	1,77E-05	6,33E-03
ENSG00000129250_KIF1C	-4,63E-01	1,84E-05	6,48E-03
ENSG00000204370_SDHD	7,75E-01	1,95E-05	6,77E-03
ENSG00000148337_CIZ1	-5,13E-01	2,02E-05	6,89E-03
ENSG00000082641_NFE2L1	-5,32E-01	2,14E-05	7,21E-03
ENSG00000170004_CHD3	-5,21E-01	2,49E-05	8,27E-03
ENSG00000168003_SLC3A2	6,36E-01	2,64E-05	8,55E-03
ENSG00000127324_TSPAN8	4,05E-01	2,66E-05	8,55E-03
ENSG00000270647_TAF15	-4,34E-01	2,70E-05	8,55E-03
ENSG00000143569_UBAP2L	-4,36E-01	2,72E-05	8,55E-03
ENSG00000006712_PAF1	-6,63E-01	2,78E-05	8,58E-03
ENSG00000189143_CLDN4	5,18E-01	2,80E-05	8,58E-03
ENSG00000139343_SNRPF	-7,15E-01	3,30E-05	9,89E-03
ENSG00000163993_S100P	4,32E-01	3,32E-05	9,89E-03
ENSG00000114867_EIF4G1	-2,84E-01	3,41E-05	1,00E-02
ENSG00000047410_TPR	-3,62E-01	3,70E-05	1,08E-02
ENSG00000147162_OGT	4,90E-01	3,84E-05	1,10E-02
ENSG00000167522_ANKRD11	-4,93E-01	3,93E-05	1,12E-02
ENSG00000007080_CCDC124	-7,70E-01	4,39E-05	1,23E-02
ENSG00000167461_RAB8A	-5,39E-01	4,45E-05	1,23E-02
ENSG00000141738_GRB7	1,92E-01	4,69E-05	1,29E-02
ENSG00000187134_AKR1C1	2,43E-01	4,82E-05	1,31E-02
ENSG00000160633_SAFB	-5,33E-01	4,98E-05	1,32E-02
ENSG00000170889_RPS9	4,62E-01	4,99E-05	1,32E-02
ENSG00000005483_KMT2E	-6,21E-01	5,05E-05	1,32E-02
ENSG00000158417_EIF5B	-4,18E-01	5,14E-05	1,32E-02
ENSG00000137337_MDC1	-7,71E-01	5,15E-05	1,32E-02
ENSG00000172785_CBWD1	-1,14E+00	5,54E-05	1,40E-02
ENSG00000100129_EIF3L	5,32E-01	5,63E-05	1,41E-02
ENSG00000165672_PRDX3	5,92E-01	5,68E-05	1,41E-02
ENSG00000108424_KPNB1	-2,98E-01	6,21E-05	1,52E-02
ENSG00000105568_PPP2R1A	5,71E-01	6,26E-05	1,52E-02
ENSG00000111676_ATN1	-5,85E-01	6,35E-05	1,53E-02
ENSG00000100300_TSPO	8,34E-01	6,54E-05	1,56E-02
ENSG00000171634_BPTF	-5,10E-01	6,90E-05	1,61E-02
ENSG00000189043_NDUFA4	5,18E-01	6,91E-05	1,61E-02
ENSG00000075415_SLC25A3	4,37E-01	7,06E-05	1,62E-02
ENSG00000168298_HIST1H1E	-4,22E+00	7,14E-05	1,62E-02
ENSG00000198888_MT-ND1	-4,72E-01	7,19E-05	1,62E-02
ENSG00000166181_API5	-4,59E-01	7,23E-05	1,62E-02
ENSG00000104341_LAPTM4B	5,81E-01	7,46E-05	1,66E-02
ENSG00000139168_ZCRB1	-5,09E-01	7,52E-05	1,66E-02
ENSG00000110723_EXPH5	-7,41E-01	7,70E-05	1,67E-02
ENSG00000127184_COX7C	7,27E-01	7,72E-05	1,67E-02
ENSG00000171530_TBCA	-8,71E-01	7,87E-05	1,68E-02
ENSG00000265972_TXNIP	5,00E-01	7,95E-05	1,69E-02
ENSG00000119596_YLPM1	-6,03E-01	8,21E-05	1,73E-02
ENSG00000145216_FIP1L1	-7,18E-01	8,56E-05	1,79E-02
ENSG00000130724_CHMP2A	-5,62E-01	8,77E-05	1,81E-02
ENSG00000197451_HNRNPAB	-3,96E-01	8,87E-05	1,82E-02
ENSG00000150991_UBC	5,02E-01	9,27E-05	1,88E-02
ENSG00000054654_SYNE2	-4,28E-01	9,63E-05	1,94E-02
ENSG00000164587_RPS14	4,51E-01	1,04E-04	2,08E-02
ENSG00000136942_RPL35	-3,69E-01	1,11E-04	2,19E-02
ENSG00000181163_NPM1	-3,23E-01	1,12E-04	2,19E-02
ENSG00000167600_CYP2S1	-4,30E-01	1,12E-04	2,19E-02
ENSG00000138668_HNRNPD	-3,37E-01	1,14E-04	2,19E-02
ENSG00000102144_PGK1	2,86E-01	1,15E-04	2,19E-02
ENSG00000099901_RANBP1	-3,98E-01	1,15E-04	2,19E-02
ENSG00000116209_TMEM59	4,84E-01	1,24E-04	2,31E-02
ENSG00000151632_AKR1C2	2,34E-01	1,24E-04	2,31E-02
ENSG00000139613_SMARCC2	-5,31E-01	1,24E-04	2,31E-02
ENSG00000105372_RPS19	3,71E-01	1,27E-04	2,31E-02
ENSG00000110200_ANAPC15	-7,85E-01	1,27E-04	2,31E-02
ENSG00000158545_ZC3H18	-5,71E-01	1,28E-04	2,31E-02
ENSG00000138777_PPA2	5,43E-01	1,29E-04	2,31E-02
ENSG00000274641_HIST1H2BO	-4,04E+00	1,31E-04	2,33E-02
ENSG00000283907_AD000090.1	-2,28E+00	1,32E-04	2,33E-02
ENSG00000173486_FKBP2	-7,00E-01	1,32E-04	2,33E-02
ENSG00000213064_SFT2D2	-4,77E-01	1,38E-04	2,40E-02
ENSG00000260027_HOXB7	-7,12E-01	1,39E-04	2,40E-02
ENSG00000137776_SLTM	-5,30E-01	1,43E-04	2,46E-02
ENSG00000196535_MYO18A	-2,78E-01	1,44E-04	2,47E-02
ENSG00000119383_PTPA	4,59E-01	1,46E-04	2,47E-02
ENSG00000136819_C9orf78	-5,01E-01	1,50E-04	2,51E-02
ENSG00000142864_SERBP1	-2,80E-01	1,50E-04	2,51E-02
ENSG00000135535_CD164	3,53E-01	1,52E-04	2,52E-02
ENSG00000100941_PNN	-4,44E-01	1,53E-04	2,52E-02
ENSG00000111832_RWDD1	-6,89E-01	1,60E-04	2,62E-02
ENSG00000160049_DFFA	-5,26E-01	1,65E-04	2,68E-02
ENSG00000147140_NONO	-2,84E-01	1,67E-04	2,70E-02
ENSG00000173597_SULT1B1	5,82E-01	1,74E-04	2,79E-02
ENSG00000063177_RPL18	3,31E-01	1,76E-04	2,80E-02
ENSG00000073350_LLGL2	4,73E-01	1,79E-04	2,82E-02
ENSG00000102554_KLF5	-2,74E-01	1,80E-04	2,82E-02
ENSG00000109475_RPL34	4,31E-01	1,81E-04	2,83E-02
ENSG00000140575_IQGAP1	-2,42E-01	1,83E-04	2,83E-02
ENSG00000141905_NFIC	-7,60E-01	2,06E-04	3,17E-02
ENSG00000132466_ANKRD17	-3,85E-01	2,07E-04	3,17E-02
ENSG00000173467_AGR3	1,12E+00	2,16E-04	3,29E-02
ENSG00000071054_MAP4K4	-5,14E-01	2,18E-04	3,30E-02
ENSG00000172354_GNB2	5,04E-01	2,25E-04	3,38E-02
ENSG00000147676_MAL2	2,49E-01	2,33E-04	3,46E-02
ENSG00000104131_EIF3J	-3,89E-01	2,34E-04	3,46E-02
ENSG00000128311_TST	5,60E-01	2,37E-04	3,49E-02
ENSG00000138398_PPIG	-4,77E-01	2,39E-04	3,49E-02
ENSG00000179820_MYADM	-4,13E-01	2,42E-04	3,51E-02
ENSG00000164713_BRI3	6,10E-01	2,43E-04	3,51E-02
ENSG00000115541_HSPE1	1,06E+00	2,46E-04	3,53E-02
ENSG00000275700_AATF	-6,46E-01	2,53E-04	3,61E-02
ENSG00000085224_ATRX	-4,91E-01	2,54E-04	3,61E-02
ENSG00000161011_SQSTM1	2,49E-01	2,58E-04	3,64E-02
ENSG00000139644_TMBIM6	2,40E-01	2,61E-04	3,65E-02
ENSG00000132780_NASP	-4,06E-01	2,62E-04	3,65E-02
ENSG00000079819_EPB41L2	-3,35E-01	2,64E-04	3,66E-02
ENSG00000245848_CEBPA	5,91E-01	2,72E-04	3,73E-02
ENSG00000134186_PRPF38B	-5,50E-01	2,76E-04	3,73E-02
ENSG00000063244_U2AF2	-3,83E-01	2,78E-04	3,73E-02
ENSG00000129990_SYT5	-8,59E-01	2,78E-04	3,73E-02
ENSG00000134825_TMEM258	1,26E+00	2,80E-04	3,73E-02
ENSG00000145833_DDX46	-4,16E-01	2,81E-04	3,73E-02
ENSG00000071082_RPL31	4,09E-01	2,81E-04	3,73E-02
ENSG00000162191_UBXN1	-7,62E-01	2,82E-04	3,73E-02
ENSG00000089327_FXYD5	-3,69E-01	2,83E-04	3,73E-02
ENSG00000117868_ESYT2	4,87E-01	2,87E-04	3,74E-02
ENSG00000198646_NCOA6	-4,73E-01	2,90E-04	3,74E-02
ENSG00000168028_RPSA	3,71E-01	2,91E-04	3,74E-02
ENSG00000100316_RPL3	2,54E-01	2,92E-04	3,74E-02
ENSG00000185499_MUC1	-2,95E-01	2,92E-04	3,74E-02
ENSG00000162413_KLHL21	8,53E-01	2,95E-04	3,75E-02
ENSG00000157873_TNFRSF14	8,15E-01	2,98E-04	3,75E-02
ENSG00000189060_H1F0	-2,38E-01	2,98E-04	3,75E-02
ENSG00000083168_KAT6A	-4,37E-01	3,15E-04	3,92E-02
ENSG00000125691_RPL23	-3,11E-01	3,15E-04	3,92E-02
ENSG00000177697_CD151	4,85E-01	3,22E-04	3,97E-02
ENSG00000110172_CHORDC1	-4,05E-01	3,22E-04	3,97E-02
ENSG00000149547_EI24	-3,57E-01	3,25E-04	3,97E-02
ENSG00000092853_CLSPN	-6,80E-01	3,25E-04	3,97E-02
ENSG00000100030_MAPK1	3,63E-01	3,36E-04	4,08E-02
ENSG00000151461_UPF2	-5,18E-01	3,38E-04	4,09E-02
ENSG00000130338_TULP4	-7,38E-01	3,43E-04	4,13E-02
ENSG00000116560_SFPQ	-3,13E-01	3,48E-04	4,17E-02
ENSG00000154380_ENAH	-3,99E-01	3,56E-04	4,24E-02
ENSG00000151914_DST	-3,33E-01	3,60E-04	4,26E-02
ENSG00000102172_SMS	-4,69E-01	3,65E-04	4,29E-02
ENSG00000234741_GAS5	4,42E-01	3,66E-04	4,29E-02
ENSG00000153187_HNRNPU	-2,12E-01	3,70E-04	4,31E-02
ENSG00000101194_SLC17A9	6,24E-01	3,78E-04	4,39E-02
ENSG00000276368_HIST1H2AJ	-3,73E+00	3,83E-04	4,42E-02
ENSG00000154310_TNIK	-4,95E-01	3,87E-04	4,44E-02
ENSG00000069849_ATP1B3	4,02E-01	3,89E-04	4,45E-02
ENSG00000104067_TJP1	-3,98E-01	3,99E-04	4,54E-02
ENSG00000245532_NEAT1	3,58E-01	4,07E-04	4,61E-02
ENSG00000100075_SLC25A1	5,20E-01	4,11E-04	4,63E-02
ENSG00000124733_MEA1	-4,20E-01	4,13E-04	4,63E-02
ENSG00000115241_PPM1G	-3,74E-01	4,14E-04	4,63E-02
ENSG00000175550_DRAP1	-7,85E-01	4,22E-04	4,68E-02
ENSG00000140564_FURIN	-5,15E-01	4,23E-04	4,68E-02
ENSG00000145494_NDUFS6	-5,07E-01	4,26E-04	4,68E-02
ENSG00000144674_GOLGA4	-3,94E-01	4,27E-04	4,68E-02
ENSG00000140807_NKD1	-8,26E-01	4,41E-04	4,81E-02
ENSG00000102241_HTATSF1	-3,87E-01	4,53E-04	4,92E-02
ENSG00000109736_MFSD10	7,60E-01	4,64E-04	5,02E-02
ENSG00000142327_RNPEPL1	6,73E-01	4,66E-04	5,02E-02
ENSG00000100028_SNRPD3	-4,03E-01	4,71E-04	5,04E-02
ENSG00000072501_SMC1A	-3,61E-01	4,74E-04	5,05E-02
ENSG00000178951_ZBTB7A	-4,44E-01	4,80E-04	5,07E-02
ENSG00000138413_IDH1	2,48E-01	4,81E-04	5,07E-02
ENSG00000238741_SCARNA7	-4,91E+00	4,82E-04	5,07E-02
ENSG00000129103_SUMF2	4,56E-01	4,89E-04	5,12E-02
ENSG00000065154_OAT	6,46E-01	4,91E-04	5,12E-02
ENSG00000250479_CHCHD10	6,11E-01	4,93E-04	5,12E-02
ENSG00000203814_HIST2H2BF	-2,72E+00	5,05E-04	5,22E-02
ENSG00000272391_POM121C	-6,17E-01	5,16E-04	5,31E-02
ENSG00000054118_THRAP3	-3,96E-01	5,24E-04	5,35E-02
ENSG00000204673_AKT1S1	-4,99E-01	5,24E-04	5,35E-02
ENSG00000137497_NUMA1	-2,76E-01	5,33E-04	5,41E-02
ENSG00000225630_MTND2P28	-5,59E-01	5,35E-04	5,41E-02
ENSG00000138385_SSB	-3,86E-01	5,43E-04	5,47E-02
ENSG00000135047_CTSL	-5,05E-01	5,50E-04	5,52E-02
ENSG00000055044_NOP58	-4,10E-01	5,61E-04	5,58E-02
ENSG00000115234_SNX17	5,80E-01	5,64E-04	5,58E-02
ENSG00000184990_SIVA1	9,12E-01	5,65E-04	5,58E-02
ENSG00000083642_PDS5B	-4,19E-01	5,72E-04	5,58E-02
ENSG00000125351_UPF3B	-5,84E-01	5,73E-04	5,58E-02
ENSG00000202538_RNU4-2	-3,61E+00	5,76E-04	5,58E-02
ENSG00000273703_HIST1H2BM	-3,61E+00	5,76E-04	5,58E-02
ENSG00000129691_ASH2L	-6,00E-01	5,77E-04	5,58E-02
ENSG00000106537_TSPAN13	3,57E-01	5,78E-04	5,58E-02
ENSG00000105618_PRPF31	-5,23E-01	5,81E-04	5,58E-02
ENSG00000145495_MARCH6	5,26E-01	5,96E-04	5,71E-02
ENSG00000089195_TRMT6	-6,05E-01	6,02E-04	5,75E-02
ENSG00000232112_TMA7	-5,33E-01	6,13E-04	5,82E-02
ENSG00000155660_PDIA4	3,19E-01	6,16E-04	5,83E-02
ENSG00000125977_EIF2S2	-3,41E-01	6,21E-04	5,85E-02
ENSG00000136868_SLC31A1	3,87E-01	6,49E-04	6,08E-02
ENSG00000155368_DBI	-5,28E-01	6,50E-04	6,08E-02
ENSG00000120742_SERP1	3,96E-01	6,54E-04	6,09E-02
ENSG00000174903_RAB1B	-3,93E-01	6,61E-04	6,13E-02
ENSG00000100033_PRODH	2,79E-01	6,92E-04	6,40E-02
ENSG00000118482_PHF3	-3,96E-01	6,99E-04	6,41E-02
ENSG00000125676_THOC2	-3,23E-01	6,99E-04	6,41E-02
ENSG00000142669_SH3BGRL3	-4,77E-01	7,19E-04	6,56E-02
ENSG00000184270_HIST2H2AB	-4,75E+00	7,25E-04	6,59E-02
ENSG00000111716_LDHB	1,41E+00	7,36E-04	6,66E-02
ENSG00000162613_FUBP1	-3,73E-01	7,37E-04	6,66E-02
ENSG00000170540_ARL6IP1	3,91E-01	7,40E-04	6,66E-02
ENSG00000161970_RPL26	-5,58E-01	7,47E-04	6,67E-02
ENSG00000136883_KIF12	5,68E-01	7,51E-04	6,67E-02
ENSG00000128283_CDC42EP1	-4,12E-01	7,52E-04	6,67E-02
ENSG00000198786_MT-ND5	-2,93E-01	7,52E-04	6,67E-02
ENSG00000099194_SCD	3,80E-01	7,62E-04	6,72E-02
ENSG00000052802_MSMO1	7,14E-01	7,69E-04	6,76E-02
ENSG00000115648_MLPH	4,58E-01	7,87E-04	6,89E-02
ENSG00000164050_PLXNB1	4,92E-01	8,14E-04	7,09E-02
ENSG00000130726_TRIM28	3,12E-01	8,24E-04	7,09E-02
ENSG00000198189_HSD17B11	6,39E-01	8,25E-04	7,09E-02
ENSG00000135930_EIF4E2	-5,15E-01	8,26E-04	7,09E-02
ENSG00000166562_SEC11C	-6,39E-01	8,28E-04	7,09E-02
ENSG00000071553_ATP6AP1	5,08E-01	8,29E-04	7,09E-02
ENSG00000186575_NF2	-5,52E-01	8,31E-04	7,09E-02
ENSG00000112576_CCND3	4,29E-01	8,34E-04	7,10E-02
ENSG00000071626_DAZAP1	-3,77E-01	8,49E-04	7,18E-02
ENSG00000142599_RERE	-4,93E-01	8,50E-04	7,18E-02
ENSG00000134057_CCNB1	5,69E-01	8,53E-04	7,18E-02
ENSG00000167378_IRGQ	-9,59E-01	8,65E-04	7,25E-02
ENSG00000159377_PSMB4	4,33E-01	8,83E-04	7,34E-02
ENSG00000163125_RPRD2	-4,61E-01	8,84E-04	7,34E-02
ENSG00000184357_HIST1H1B	-2,86E+00	8,87E-04	7,34E-02
ENSG00000117410_ATP6V0B	7,11E-01	8,88E-04	7,34E-02
ENSG00000132688_NES	-6,41E-01	8,93E-04	7,35E-02
ENSG00000119820_YIPF4	5,75E-01	9,04E-04	7,38E-02
ENSG00000119431_HDHD3	5,70E-01	9,05E-04	7,38E-02
ENSG00000137815_RTF1	-4,22E-01	9,06E-04	7,38E-02
ENSG00000188747_NOXA1	1,34E+00	9,09E-04	7,38E-02
ENSG00000101745_ANKRD12	-3,59E-01	9,23E-04	7,47E-02
ENSG00000172775_FAM192A	-5,15E-01	9,27E-04	7,48E-02
ENSG00000158109_TPRG1L	5,04E-01	9,40E-04	7,55E-02
ENSG00000143164_DCAF6	-5,45E-01	9,41E-04	7,55E-02
ENSG00000113810_SMC4	-2,55E-01	9,50E-04	7,56E-02
ENSG00000184897_H1FX	7,76E-01	9,51E-04	7,56E-02
ENSG00000196155_PLEKHG4	1,05E+00	9,53E-04	7,56E-02
ENSG00000257103_LSM14A	-3,19E-01	9,75E-04	7,70E-02
ENSG00000150753_CCT5	-2,97E-01	9,77E-04	7,70E-02
ENSG00000136811_ODF2	-4,69E-01	9,83E-04	7,72E-02
ENSG00000119707_RBM25	-3,67E-01	9,94E-04	7,72E-02
ENSG00000080608_PUM3	-5,56E-01	9,95E-04	7,72E-02
ENSG00000105655_ISYNA1	5,15E-01	9,95E-04	7,72E-02
ENSG00000204120_GIGYF2	-4,70E-01	9,96E-04	7,72E-02
ENSG00000153130_SCOC	7,40E-01	1,00E-03	7,74E-02
ENSG00000205542_TMSB4X	3,81E-01	1,00E-03	7,74E-02
ENSG00000253738_OTUD6B-AS1	-6,31E-01	1,01E-03	7,75E-02
ENSG00000117448_AKR1A1	5,79E-01	1,03E-03	7,84E-02
ENSG00000175772_LINC01106	-1,45E+00	1,03E-03	7,84E-02
ENSG00000265241_RBM8A	-3,87E-01	1,03E-03	7,86E-02
ENSG00000215182_MUC5AC	-5,68E-01	1,05E-03	7,96E-02
ENSG00000071894_CPSF1	4,95E-01	1,08E-03	8,14E-02
ENSG00000198763_MT-ND2	-4,43E-01	1,08E-03	8,14E-02
ENSG00000185650_ZFP36L1	-3,58E-01	1,09E-03	8,17E-02
ENSG00000047249_ATP6V1H	8,63E-01	1,09E-03	8,17E-02
ENSG00000198087_CD2AP	-2,76E-01	1,12E-03	8,35E-02
ENSG00000160014_CALM3	-2,33E-01	1,13E-03	8,39E-02
ENSG00000100393_EP300	-3,22E-01	1,14E-03	8,42E-02
ENSG00000107281_NPDC1	4,74E-01	1,14E-03	8,45E-02
ENSG00000213279_Z97192.2	-4,57E+00	1,15E-03	8,45E-02
ENSG00000176340_COX8A	6,84E-01	1,15E-03	8,45E-02
ENSG00000198176_TFDP1	2,80E-01	1,16E-03	8,45E-02
ENSG00000146828_SLC12A9	5,80E-01	1,16E-03	8,45E-02
ENSG00000182325_FBXL6	1,02E+00	1,17E-03	8,50E-02
ENSG00000152234_ATP5F1A	3,38E-01	1,17E-03	8,51E-02
ENSG00000149136_SSRP1	-3,00E-01	1,19E-03	8,58E-02
ENSG00000198900_TOP1	-3,08E-01	1,19E-03	8,58E-02
ENSG00000119335_SET	-2,19E-01	1,20E-03	8,64E-02
ENSG00000168906_MAT2A	3,35E-01	1,22E-03	8,76E-02
ENSG00000188186_LAMTOR4	6,49E-01	1,23E-03	8,80E-02
ENSG00000048649_RSF1	-3,63E-01	1,25E-03	8,89E-02
ENSG00000125398_SOX9	-3,41E-01	1,27E-03	9,04E-02
ENSG00000005206_SPPL2B	6,88E-01	1,28E-03	9,04E-02
ENSG00000117395_EBNA1BP2	-4,37E-01	1,29E-03	9,07E-02
ENSG00000139197_PEX5	6,41E-01	1,30E-03	9,16E-02
ENSG00000163191_S100A11	-2,59E-01	1,31E-03	9,21E-02
ENSG00000105723_GSK3A	-4,80E-01	1,32E-03	9,21E-02
ENSG00000176393_RNPEP	4,75E-01	1,33E-03	9,29E-02
ENSG00000221926_TRIM16	5,21E-01	1,34E-03	9,31E-02
ENSG00000126464_PRR12	-5,05E-01	1,34E-03	9,31E-02
ENSG00000167900_TK1	4,28E-01	1,35E-03	9,35E-02
ENSG00000060237_WNK1	-2,91E-01	1,36E-03	9,37E-02
ENSG00000017797_RALBP1	-2,56E-01	1,37E-03	9,38E-02
ENSG00000196498_NCOR2	-3,08E-01	1,37E-03	9,38E-02
ENSG00000095787_WAC	-3,62E-01	1,37E-03	9,38E-02
ENSG00000182903_ZNF721	-6,83E-01	1,38E-03	9,41E-02
ENSG00000215114_UBXN2B	-4,39E-01	1,39E-03	9,41E-02
ENSG00000116747_TROVE2	-5,46E-01	1,39E-03	9,42E-02
ENSG00000067225_PKM	-1,42E-01	1,40E-03	9,48E-02
ENSG00000166477_LEO1	-4,14E-01	1,41E-03	9,48E-02
ENSG00000167088_SNRPD1	-3,85E-01	1,41E-03	9,48E-02
ENSG00000178467_P4HTM	6,67E-01	1,42E-03	9,48E-02
ENSG00000069275_NUCKS1	-2,53E-01	1,42E-03	9,49E-02
ENSG00000128789_PSMG2	3,99E-01	1,44E-03	9,57E-02
ENSG00000134453_RBM17	-3,34E-01	1,44E-03	9,57E-02
ENSG00000200795_RNU4-1	-3,34E+00	1,46E-03	9,65E-02
ENSG00000103187_COTL1	-3,71E-01	1,47E-03	9,71E-02
ENSG00000088992_TESC	3,94E-01	1,48E-03	9,74E-02
ENSG00000285219_AL591485.1	-2,88E+00	1,53E-03	1,00E-01
ENSG00000070081_NUCB2	-4,24E-01	1,56E-03	1,02E-01
ENSG00000155229_MMS19	6,16E-01	1,57E-03	1,03E-01
ENSG00000122126_OCRL	4,57E-01	1,59E-03	1,03E-01
ENSG00000100029_PES1	-4,04E-01	1,59E-03	1,03E-01
ENSG00000096401_CDC5L	-2,55E-01	1,60E-03	1,04E-01
ENSG00000104635_SLC39A14	3,79E-01	1,63E-03	1,05E-01
ENSG00000124831_LRRFIP1	-3,05E-01	1,63E-03	1,05E-01
ENSG00000120656_TAF12	-7,53E-01	1,64E-03	1,06E-01
ENSG00000068697_LAPTM4A	3,70E-01	1,66E-03	1,06E-01
ENSG00000116350_SRSF4	-4,67E-01	1,66E-03	1,06E-01
ENSG00000108349_CASC3	-4,80E-01	1,68E-03	1,07E-01
ENSG00000150093_ITGB1	-2,94E-01	1,68E-03	1,07E-01
ENSG00000185043_CIB1	5,16E-01	1,69E-03	1,07E-01
ENSG00000058262_SEC61A1	3,07E-01	1,70E-03	1,08E-01
ENSG00000105722_ERF	-4,67E-01	1,72E-03	1,08E-01
ENSG00000204469_PRRC2A	-2,92E-01	1,75E-03	1,10E-01
ENSG00000131013_PPIL4	-5,99E-01	1,75E-03	1,10E-01
ENSG00000106245_BUD31	-4,98E-01	1,77E-03	1,10E-01
ENSG00000019102_VSIG2	4,23E-01	1,78E-03	1,11E-01
ENSG00000117877_CD3EAP	-5,25E-01	1,78E-03	1,11E-01
ENSG00000198252_STYX	-6,49E-01	1,79E-03	1,11E-01
ENSG00000122779_TRIM24	-3,51E-01	1,80E-03	1,11E-01
ENSG00000158201_ABHD3	6,06E-01	1,81E-03	1,11E-01
ENSG00000179674_ARL14	1,44E+00	1,81E-03	1,11E-01
ENSG00000105011_ASF1B	4,67E-01	1,81E-03	1,11E-01
ENSG00000156650_KAT6B	-5,82E-01	1,82E-03	1,11E-01
ENSG00000167642_SPINT2	2,63E-01	1,83E-03	1,11E-01
ENSG00000155506_LARP1	-2,53E-01	1,83E-03	1,11E-01
ENSG00000108179_PPIF	4,63E-01	1,83E-03	1,11E-01
ENSG00000009954_BAZ1B	-2,99E-01	1,84E-03	1,12E-01
ENSG00000275126_HIST1H4L	-3,58E+00	1,87E-03	1,13E-01
ENSG00000213995_NAXD	5,70E-01	1,88E-03	1,13E-01
ENSG00000127328_RAB3IP	-5,54E-01	1,88E-03	1,13E-01
ENSG00000100219_XBP1	2,47E-01	1,91E-03	1,15E-01
ENSG00000230510_PPP5D1	-4,37E+00	1,93E-03	1,15E-01
ENSG00000184009_ACTG1	2,01E-01	1,94E-03	1,15E-01
ENSG00000169905_TOR1AIP2	-3,91E-01	1,94E-03	1,16E-01
ENSG00000121964_GTDC1	-1,11E+00	1,95E-03	1,16E-01
ENSG00000125534_PPDPF	-3,15E-01	1,96E-03	1,16E-01
ENSG00000255717_SNHG1	7,13E-01	1,96E-03	1,16E-01
ENSG00000157593_SLC35B2	3,50E-01	1,97E-03	1,16E-01
ENSG00000148672_GLUD1	3,54E-01	1,97E-03	1,16E-01
ENSG00000172534_HCFC1	-3,40E-01	1,99E-03	1,17E-01
ENSG00000129292_PHF20L1	-4,66E-01	2,03E-03	1,19E-01
ENSG00000119314_PTBP3	-2,29E-01	2,04E-03	1,19E-01
ENSG00000113407_TARS	-3,32E-01	2,04E-03	1,19E-01
ENSG00000137491_SLCO2B1	4,25E-01	2,07E-03	1,20E-01
ENSG00000135679_MDM2	-5,56E-01	2,07E-03	1,20E-01
ENSG00000149480_MTA2	-4,08E-01	2,09E-03	1,20E-01
ENSG00000163848_ZNF148	-4,68E-01	2,09E-03	1,21E-01
ENSG00000108107_RPL28	-2,62E-01	2,10E-03	1,21E-01
ENSG00000131941_RHPN2	5,03E-01	2,14E-03	1,22E-01
ENSG00000171858_RPS21	3,29E-01	2,14E-03	1,22E-01
ENSG00000105738_SIPA1L3	-3,39E-01	2,15E-03	1,22E-01
ENSG00000204628_RACK1	2,19E-01	2,16E-03	1,23E-01
ENSG00000147813_NAPRT	5,37E-01	2,16E-03	1,23E-01
ENSG00000196188_CTSE	-1,81E-01	2,17E-03	1,23E-01
ENSG00000119969_HELLS	-4,87E-01	2,19E-03	1,24E-01
ENSG00000113141_IK	-4,82E-01	2,19E-03	1,24E-01
ENSG00000103550_KNOP1	-4,99E-01	2,22E-03	1,25E-01
ENSG00000099783_HNRNPM	-2,67E-01	2,22E-03	1,25E-01
ENSG00000138449_SLC40A1	3,41E-01	2,23E-03	1,25E-01
ENSG00000113328_CCNG1	5,44E-01	2,26E-03	1,25E-01
ENSG00000005339_CREBBP	-4,47E-01	2,27E-03	1,25E-01
ENSG00000110075_PPP6R3	-2,50E-01	2,27E-03	1,25E-01
ENSG00000187555_USP7	-2,93E-01	2,27E-03	1,25E-01
ENSG00000138430_OLA1	-3,43E-01	2,27E-03	1,25E-01
ENSG00000100354_TNRC6B	-5,12E-01	2,27E-03	1,25E-01
ENSG00000100764_PSMC1	-5,09E-01	2,28E-03	1,25E-01
ENSG00000183172_SMDT1	9,31E-01	2,29E-03	1,25E-01
ENSG00000111615_KRR1	-4,59E-01	2,29E-03	1,25E-01
ENSG00000151414_NEK7	4,51E-01	2,30E-03	1,26E-01
ENSG00000116871_MAP7D1	-6,12E-01	2,32E-03	1,26E-01
ENSG00000198363_ASPH	-1,53E-01	2,34E-03	1,27E-01
ENSG00000155465_SLC7A7	4,21E-01	2,35E-03	1,27E-01
ENSG00000153147_SMARCA5	-2,72E-01	2,36E-03	1,27E-01
ENSG00000126247_CAPNS1	-2,74E-01	2,37E-03	1,27E-01
ENSG00000144848_ATG3	-4,12E-01	2,37E-03	1,27E-01
ENSG00000174720_LARP7	-4,69E-01	2,37E-03	1,27E-01
ENSG00000204574_ABCF1	-4,05E-01	2,38E-03	1,27E-01
ENSG00000237973_MTCO1P12	1,00E+00	2,38E-03	1,27E-01
ENSG00000148834_GSTO1	5,21E-01	2,38E-03	1,27E-01
ENSG00000148341_SH3GLB2	3,80E-01	2,40E-03	1,28E-01
ENSG00000137693_YAP1	-2,81E-01	2,41E-03	1,28E-01
ENSG00000174282_ZBTB4	-6,00E-01	2,44E-03	1,29E-01
ENSG00000101577_LPIN2	6,00E-01	2,46E-03	1,30E-01
ENSG00000169989_TIGD4	-3,18E+00	2,47E-03	1,30E-01
ENSG00000204899_MZT1	5,14E-01	2,47E-03	1,30E-01
ENSG00000136111_TBC1D4	3,69E-01	2,48E-03	1,31E-01
ENSG00000168264_IRF2BP2	2,97E-01	2,49E-03	1,31E-01
ENSG00000149313_AASDHPPT	5,93E-01	2,50E-03	1,31E-01
ENSG00000109265_KIAA1211	-6,69E-01	2,51E-03	1,31E-01
ENSG00000100380_ST13	-2,66E-01	2,51E-03	1,31E-01
ENSG00000087365_SF3B2	-3,11E-01	2,51E-03	1,31E-01
ENSG00000152601_MBNL1	-3,61E-01	2,52E-03	1,31E-01
ENSG00000148291_SURF2	-6,09E-01	2,55E-03	1,32E-01
ENSG00000134240_HMGCS2	3,14E-01	2,56E-03	1,32E-01
ENSG00000125304_TM9SF2	2,39E-01	2,57E-03	1,32E-01
ENSG00000143761_ARF1	2,17E-01	2,57E-03	1,32E-01
ENSG00000165376_CLDN2	-2,64E-01	2,57E-03	1,32E-01
ENSG00000129347_KRI1	-5,07E-01	2,58E-03	1,32E-01
ENSG00000091409_ITGA6	-1,93E-01	2,58E-03	1,32E-01
ENSG00000169246_NPIPB3	-1,32E+00	2,58E-03	1,32E-01
ENSG00000029993_HMGB3	-3,59E-01	2,59E-03	1,32E-01
ENSG00000176386_CDC26	-6,66E-01	2,63E-03	1,33E-01
ENSG00000142230_SAE1	-3,04E-01	2,67E-03	1,35E-01
ENSG00000172954_LCLAT1	-6,46E-01	2,67E-03	1,35E-01
ENSG00000044574_HSPA5	1,51E-01	2,68E-03	1,35E-01
ENSG00000123064_DDX54	-3,83E-01	2,69E-03	1,36E-01
ENSG00000062282_DGAT2	5,04E-01	2,72E-03	1,37E-01
ENSG00000170144_HNRNPA3	-2,07E-01	2,74E-03	1,37E-01
ENSG00000235363_SNRPGP10	-1,39E+00	2,74E-03	1,37E-01
ENSG00000016391_CHDH	4,04E-01	2,76E-03	1,38E-01
ENSG00000064601_CTSA	4,32E-01	2,77E-03	1,38E-01
ENSG00000175582_RAB6A	-2,81E-01	2,78E-03	1,38E-01
ENSG00000129083_COPB1	3,24E-01	2,80E-03	1,39E-01
ENSG00000110090_CPT1A	-2,35E-01	2,83E-03	1,40E-01
ENSG00000106153_CHCHD2	3,30E-01	2,86E-03	1,41E-01
ENSG00000145220_LYAR	-5,21E-01	2,86E-03	1,41E-01
ENSG00000167670_CHAF1A	-4,59E-01	2,88E-03	1,42E-01
ENSG00000101057_MYBL2	-2,85E-01	2,92E-03	1,43E-01
ENSG00000259699_HMGB1P8	-2,27E+00	2,95E-03	1,44E-01
ENSG00000198171_DDRGK1	-5,14E-01	2,96E-03	1,44E-01
ENSG00000108312_UBTF	-3,95E-01	2,96E-03	1,44E-01
ENSG00000143947_RPS27A	3,20E-01	2,99E-03	1,45E-01
ENSG00000063046_EIF4B	-2,36E-01	3,00E-03	1,46E-01
ENSG00000237441_RGL2	7,51E-01	3,04E-03	1,47E-01
ENSG00000162385_MAGOH	-6,10E-01	3,09E-03	1,49E-01
ENSG00000109971_HSPA8	-2,02E-01	3,11E-03	1,50E-01
ENSG00000126432_PRDX5	-4,65E-01	3,13E-03	1,51E-01
ENSG00000163466_ARPC2	-2,78E-01	3,16E-03	1,52E-01
ENSG00000196199_MPHOSPH8	-3,75E-01	3,17E-03	1,52E-01
ENSG00000173020_GRK2	3,19E-01	3,18E-03	1,52E-01
ENSG00000185262_UBALD2	-4,36E-01	3,19E-03	1,52E-01
ENSG00000110048_OSBP	-3,41E-01	3,19E-03	1,52E-01
ENSG00000168476_REEP4	5,19E-01	3,21E-03	1,52E-01
ENSG00000065559_MAP2K4	4,89E-01	3,21E-03	1,52E-01
ENSG00000135046_ANXA1	2,58E-01	3,21E-03	1,52E-01
ENSG00000179218_CALR	-1,75E-01	3,24E-03	1,53E-01
ENSG00000051009_FAM160A2	6,99E-01	3,24E-03	1,53E-01
ENSG00000072135_PTPN18	-4,56E-01	3,25E-03	1,53E-01
ENSG00000205922_ONECUT3	-4,07E-01	3,26E-03	1,53E-01
ENSG00000105976_MET	3,87E-01	3,27E-03	1,54E-01
ENSG00000184208_C22orf46	-4,16E-01	3,30E-03	1,55E-01
ENSG00000084733_RAB10	-2,60E-01	3,31E-03	1,55E-01
ENSG00000279133_AC018628.1	-2,77E+00	3,32E-03	1,55E-01
ENSG00000166136_NDUFB8	1,95E+00	3,33E-03	1,55E-01
ENSG00000005001_PRSS22	9,40E-01	3,33E-03	1,55E-01
ENSG00000149929_HIRIP3	-7,12E-01	3,34E-03	1,55E-01
ENSG00000108784_NAGLU	8,21E-01	3,35E-03	1,55E-01
ENSG00000143418_CERS2	2,51E-01	3,37E-03	1,56E-01
ENSG00000175592_FOSL1	-7,33E-01	3,38E-03	1,56E-01
ENSG00000170915_PAQR8	3,14E-01	3,39E-03	1,56E-01
ENSG00000124429_POF1B	-2,54E-01	3,41E-03	1,57E-01
ENSG00000165434_PGM2L1	8,43E-01	3,43E-03	1,57E-01
ENSG00000114942_EEF1B2	-2,82E-01	3,44E-03	1,57E-01
ENSG00000052795_FNIP2	4,90E-01	3,44E-03	1,57E-01
ENSG00000198887_SMC5	-3,05E-01	3,44E-03	1,57E-01
ENSG00000196233_LCOR	-3,84E-01	3,45E-03	1,57E-01
ENSG00000117713_ARID1A	-2,94E-01	3,47E-03	1,57E-01
ENSG00000105677_TMEM147	4,45E-01	3,47E-03	1,57E-01
ENSG00000278588_HIST1H2BI	-4,12E+00	3,49E-03	1,57E-01
ENSG00000198673_FAM19A2	-4,12E+00	3,49E-03	1,57E-01
ENSG00000225840_AC010970.1	-4,12E+00	3,49E-03	1,57E-01
ENSG00000175606_TMEM70	6,11E-01	3,53E-03	1,59E-01
ENSG00000181019_NQO1	2,06E-01	3,54E-03	1,59E-01
ENSG00000010818_HIVEP2	-8,28E-01	3,58E-03	1,60E-01
ENSG00000120875_DUSP4	2,32E-01	3,59E-03	1,60E-01
ENSG00000110628_SLC22A18	5,66E-01	3,59E-03	1,60E-01
ENSG00000005075_POLR2J	-6,56E-01	3,59E-03	1,60E-01
ENSG00000084463_WBP11	-3,69E-01	3,59E-03	1,60E-01
ENSG00000089157_RPLP0	2,05E-01	3,61E-03	1,60E-01
ENSG00000109586_GALNT7	3,37E-01	3,63E-03	1,60E-01
ENSG00000124688_MAD2L1BP	4,52E-01	3,64E-03	1,60E-01
ENSG00000167617_CDC42EP5	5,98E-01	3,65E-03	1,60E-01
ENSG00000106554_CHCHD3	-3,35E-01	3,65E-03	1,60E-01
ENSG00000175061_LRRC75A-AS1	2,23E-01	3,65E-03	1,60E-01
ENSG00000166734_CASC4	-2,99E-01	3,65E-03	1,60E-01
ENSG00000175467_SART1	-4,89E-01	3,66E-03	1,60E-01
ENSG00000104904_OAZ1	3,21E-01	3,68E-03	1,61E-01
ENSG00000276966_HIST1H4E	-2,29E+00	3,70E-03	1,61E-01
ENSG00000165264_NDUFB6	6,61E-01	3,74E-03	1,63E-01
ENSG00000105220_GPI	2,25E-01	3,76E-03	1,63E-01
ENSG00000100417_PMM1	5,06E-01	3,79E-03	1,64E-01
ENSG00000178597_PSAPL1	7,49E-01	3,80E-03	1,64E-01
ENSG00000277224_HIST1H2BF	-2,37E+00	3,80E-03	1,64E-01
ENSG00000179104_TMTC2	-5,56E-01	3,80E-03	1,64E-01
ENSG00000104870_FCGRT	4,45E-01	3,81E-03	1,64E-01
ENSG00000279089_AC005839.1	-2,42E+00	3,82E-03	1,64E-01
ENSG00000102309_PIN4	-6,38E-01	3,83E-03	1,64E-01
ENSG00000140988_RPS2	-2,41E-01	3,95E-03	1,69E-01
ENSG00000117899_MESD	-4,20E-01	3,96E-03	1,69E-01
ENSG00000133422_MORC2	-3,87E-01	3,97E-03	1,70E-01
ENSG00000109881_CCDC34	-5,67E-01	4,01E-03	1,70E-01
ENSG00000136240_KDELR2	2,52E-01	4,02E-03	1,70E-01
ENSG00000108679_LGALS3BP	2,65E-01	4,02E-03	1,70E-01
ENSG00000181191_PJA1	-5,85E-01	4,02E-03	1,70E-01
ENSG00000138119_MYOF	-3,29E-01	4,03E-03	1,70E-01
ENSG00000197858_GPAA1	4,74E-01	4,04E-03	1,70E-01
ENSG00000138778_CENPE	-3,63E-01	4,06E-03	1,71E-01
ENSG00000162599_NFIA	-6,53E-01	4,08E-03	1,72E-01
ENSG00000076604_TRAF4	4,14E-01	4,09E-03	1,72E-01
ENSG00000022567_SLC45A4	4,42E-01	4,10E-03	1,72E-01
ENSG00000163029_SMC6	-4,45E-01	4,11E-03	1,72E-01
ENSG00000116001_TIA1	5,39E-01	4,12E-03	1,72E-01
ENSG00000168936_TMEM129	6,44E-01	4,13E-03	1,72E-01
ENSG00000101421_CHMP4B	-2,94E-01	4,14E-03	1,73E-01
ENSG00000103274_NUBP1	-8,09E-01	4,16E-03	1,73E-01
ENSG00000117472_TSPAN1	5,14E-01	4,17E-03	1,73E-01
ENSG00000129933_MAU2	5,47E-01	4,19E-03	1,73E-01
ENSG00000163348_PYGO2	4,79E-01	4,19E-03	1,73E-01
ENSG00000164896_FASTK	5,73E-01	4,20E-03	1,73E-01
ENSG00000093009_CDC45	-4,11E-01	4,23E-03	1,74E-01
ENSG00000203697_CAPN8	3,52E-01	4,26E-03	1,75E-01
ENSG00000145375_SPATA5	-6,76E-01	4,26E-03	1,75E-01
ENSG00000111011_RSRC2	-3,86E-01	4,31E-03	1,77E-01
ENSG00000173905_GOLIM4	-3,24E-01	4,33E-03	1,77E-01
ENSG00000148229_POLE3	-3,25E-01	4,35E-03	1,78E-01
ENSG00000142168_SOD1	-3,19E-01	4,36E-03	1,78E-01
ENSG00000156467_UQCRB	-2,98E-01	4,38E-03	1,78E-01
ENSG00000225031_EIF4BP7	-2,89E+00	4,38E-03	1,78E-01
ENSG00000260442_ATP2A1-AS1	-2,89E+00	4,38E-03	1,78E-01
ENSG00000111843_TMEM14C	5,37E-01	4,40E-03	1,78E-01
ENSG00000165416_SUGT1	-4,23E-01	4,40E-03	1,78E-01
ENSG00000282034_AC106886.5	-3,00E+00	4,42E-03	1,78E-01
ENSG00000185130_HIST1H2BL	-3,00E+00	4,42E-03	1,78E-01
ENSG00000141698_NT5C3B	4,07E-01	4,46E-03	1,79E-01
ENSG00000181192_DHTKD1	4,26E-01	4,48E-03	1,80E-01
ENSG00000143740_SNAP47	5,82E-01	4,52E-03	1,81E-01
ENSG00000122085_MTERF4	-6,24E-01	4,53E-03	1,81E-01
ENSG00000174748_RPL15	2,33E-01	4,53E-03	1,81E-01
ENSG00000170373_CST1	-2,02E+00	4,55E-03	1,81E-01
ENSG00000107537_PHYH	6,89E-01	4,56E-03	1,81E-01
ENSG00000116260_QSOX1	2,63E-01	4,57E-03	1,81E-01
ENSG00000107372_ZFAND5	3,12E-01	4,58E-03	1,82E-01
ENSG00000105135_ILVBL	5,97E-01	4,60E-03	1,82E-01
ENSG00000113504_SLC12A7	4,17E-01	4,63E-03	1,83E-01
ENSG00000130748_TMEM160	1,18E+00	4,64E-03	1,83E-01
ENSG00000163346_PBXIP1	6,80E-01	4,68E-03	1,84E-01
ENSG00000070814_TCOF1	-3,89E-01	4,68E-03	1,84E-01
ENSG00000228323_AC008440.1	-2,66E+00	4,69E-03	1,84E-01
ENSG00000115762_PLEKHB2	3,21E-01	4,70E-03	1,84E-01
ENSG00000175265_GOLGA8A	9,26E-01	4,72E-03	1,85E-01
ENSG00000088448_ANKRD10	3,83E-01	4,78E-03	1,87E-01
ENSG00000125166_GOT2	4,00E-01	4,78E-03	1,87E-01
ENSG00000035928_RFC1	-3,77E-01	4,79E-03	1,87E-01
ENSG00000196313_POM121	-4,91E-01	4,80E-03	1,87E-01
ENSG00000266412_NCOA4	3,24E-01	4,83E-03	1,87E-01
ENSG00000139514_SLC7A1	-2,48E-01	4,87E-03	1,88E-01
ENSG00000116030_SUMO1	-3,65E-01	4,87E-03	1,88E-01
ENSG00000080824_HSP90AA1	-1,69E-01	4,90E-03	1,89E-01
ENSG00000105887_MTPN	3,28E-01	4,99E-03	1,92E-01
ENSG00000232956_SNHG15	6,77E-01	4,99E-03	1,92E-01
ENSG00000090266_NDUFB2	6,09E-01	5,01E-03	1,93E-01
ENSG00000171067_C11orf24	-4,09E-01	5,03E-03	1,93E-01
ENSG00000165637_VDAC2	4,13E-01	5,05E-03	1,93E-01
ENSG00000204385_SLC44A4	3,84E-01	5,05E-03	1,93E-01
ENSG00000188229_TUBB4B	-1,71E-01	5,06E-03	1,93E-01
ENSG00000143933_CALM2	2,25E-01	5,07E-03	1,93E-01
ENSG00000214049_UCA1	-6,51E-01	5,07E-03	1,93E-01
ENSG00000135373_EHF	-2,62E-01	5,09E-03	1,94E-01
ENSG00000105401_CDC37	-3,05E-01	5,15E-03	1,95E-01
ENSG00000143621_ILF2	-2,30E-01	5,16E-03	1,95E-01
ENSG00000204160_ZDHHC18	5,22E-01	5,16E-03	1,95E-01
ENSG00000182944_EWSR1	-2,37E-01	5,18E-03	1,95E-01
ENSG00000126698_DNAJC8	-3,80E-01	5,24E-03	1,98E-01
ENSG00000117335_CD46	3,59E-01	5,28E-03	1,99E-01
ENSG00000196504_PRPF40A	-2,84E-01	5,32E-03	2,00E-01
ENSG00000117394_SLC2A1	4,17E-01	5,33E-03	2,00E-01
ENSG00000167183_PRR15L	3,92E-01	5,34E-03	2,00E-01
ENSG00000145214_DGKQ	4,93E-01	5,37E-03	2,01E-01
ENSG00000114544_SLC41A3	6,58E-01	5,38E-03	2,01E-01
ENSG00000141367_CLTC	1,71E-01	5,39E-03	2,01E-01
ENSG00000259038_AL121820.2	-3,89E+00	5,39E-03	2,01E-01
ENSG00000116455_WDR77	6,82E-01	5,43E-03	2,02E-01
ENSG00000116161_CACYBP	-2,78E-01	5,44E-03	2,02E-01
ENSG00000275807_AC145285.6	-2,63E+00	5,46E-03	2,02E-01
ENSG00000185803_SLC52A2	4,43E-01	5,46E-03	2,02E-01
ENSG00000101160_CTSZ	-3,77E-01	5,47E-03	2,02E-01
ENSG00000105185_PDCD5	-3,60E-01	5,50E-03	2,03E-01
ENSG00000128908_INO80	-3,76E-01	5,53E-03	2,03E-01
ENSG00000064393_HIPK2	-4,13E-01	5,53E-03	2,03E-01
ENSG00000188257_PLA2G2A	-2,49E-01	5,56E-03	2,04E-01
ENSG00000095380_NANS	-3,21E-01	5,58E-03	2,04E-01
ENSG00000141380_SS18	-3,55E-01	5,59E-03	2,04E-01
ENSG00000147804_SLC39A4	-5,25E-01	5,60E-03	2,04E-01
ENSG00000103365_GGA2	4,35E-01	5,60E-03	2,04E-01
ENSG00000245694_CRNDE	1,09E+00	5,62E-03	2,05E-01
ENSG00000006042_TMEM98	5,13E-01	5,64E-03	2,05E-01
ENSG00000237039_AC018738.1	-2,52E+00	5,66E-03	2,05E-01
ENSG00000141556_TBCD	4,47E-01	5,68E-03	2,06E-01
ENSG00000099889_ARVCF	9,17E-01	5,71E-03	2,07E-01
ENSG00000143147_GPR161	4,47E-01	5,73E-03	2,07E-01
ENSG00000050426_LETMD1	7,25E-01	5,81E-03	2,10E-01
ENSG00000102024_PLS3	3,39E-01	5,83E-03	2,10E-01
ENSG00000110651_CD81	3,31E-01	5,84E-03	2,10E-01
ENSG00000165997_ARL5B	4,23E-01	5,84E-03	2,10E-01
ENSG00000128626_MRPS12	5,13E-01	5,90E-03	2,12E-01
ENSG00000119977_TCTN3	6,10E-01	5,98E-03	2,14E-01
ENSG00000113368_LMNB1	-2,94E-01	5,98E-03	2,14E-01
ENSG00000151348_EXT2	4,28E-01	5,99E-03	2,14E-01
ENSG00000221978_CCNL2	3,77E-01	6,00E-03	2,14E-01
ENSG00000125835_SNRPB	4,03E-01	6,01E-03	2,14E-01
ENSG00000185515_BRCC3	-3,24E-01	6,02E-03	2,14E-01
ENSG00000100591_AHSA1	-3,51E-01	6,03E-03	2,14E-01
ENSG00000173801_JUP	-1,10E-01	6,04E-03	2,14E-01
ENSG00000165152_TMEM246	4,40E-01	6,04E-03	2,14E-01
ENSG00000178904_DPY19L3	5,41E-01	6,05E-03	2,14E-01
ENSG00000070061_ELP1	3,90E-01	6,12E-03	2,15E-01
ENSG00000146826_C7orf43	7,52E-01	6,12E-03	2,15E-01
ENSG00000093167_LRRFIP2	-5,22E-01	6,13E-03	2,15E-01
ENSG00000184260_HIST2H2AC	-1,99E+00	6,14E-03	2,15E-01
ENSG00000099849_RASSF7	5,00E-01	6,14E-03	2,15E-01
ENSG00000215018_COL28A1	-1,03E+00	6,24E-03	2,18E-01
ENSG00000117724_CENPF	-2,56E-01	6,25E-03	2,18E-01
ENSG00000188986_NELFB	3,48E-01	6,26E-03	2,18E-01
ENSG00000182149_IST1	3,68E-01	6,27E-03	2,18E-01
ENSG00000181555_SETD2	-3,47E-01	6,28E-03	2,18E-01
ENSG00000102390_PBDC1	-5,05E-01	6,28E-03	2,18E-01
ENSG00000106009_BRAT1	6,37E-01	6,30E-03	2,19E-01
ENSG00000156802_ATAD2	-2,16E-01	6,38E-03	2,21E-01
ENSG00000176531_PHLDB3	-6,59E-01	6,38E-03	2,21E-01
ENSG00000141027_NCOR1	-1,97E-01	6,39E-03	2,21E-01
ENSG00000087087_SRRT	-3,11E-01	6,42E-03	2,21E-01
ENSG00000243302_AC018638.4	-1,02E+00	6,44E-03	2,22E-01
ENSG00000169813_HNRNPF	-2,04E-01	6,45E-03	2,22E-01
ENSG00000167004_PDIA3	-1,87E-01	6,47E-03	2,22E-01
ENSG00000152558_TMEM123	-1,97E-01	6,47E-03	2,22E-01
ENSG00000143376_SNX27	-3,70E-01	6,48E-03	2,22E-01
ENSG00000108055_SMC3	-2,95E-01	6,49E-03	2,22E-01
ENSG00000184840_TMED9	3,91E-01	6,50E-03	2,22E-01
ENSG00000166197_NOLC1	-2,58E-01	6,53E-03	2,22E-01
ENSG00000006634_DBF4	-4,19E-01	6,53E-03	2,22E-01
ENSG00000065268_WDR18	6,13E-01	6,55E-03	2,23E-01
ENSG00000148290_SURF1	5,47E-01	6,61E-03	2,24E-01
ENSG00000105393_BABAM1	1,05E+00	6,63E-03	2,25E-01
ENSG00000143162_CREG1	3,26E-01	6,64E-03	2,25E-01
ENSG00000137331_IER3	-4,67E-01	6,65E-03	2,25E-01
ENSG00000101182_PSMA7	2,98E-01	6,66E-03	2,25E-01
ENSG00000130985_UBA1	2,80E-01	6,67E-03	2,25E-01
ENSG00000120685_PROSER1	-3,50E-01	6,70E-03	2,25E-01
ENSG00000169019_COMMD8	1,03E+00	6,71E-03	2,25E-01
ENSG00000112514_CUTA	4,52E-01	6,73E-03	2,25E-01
ENSG00000117360_PRPF3	-3,63E-01	6,76E-03	2,25E-01
ENSG00000099341_PSMD8	-2,67E-01	6,77E-03	2,25E-01
ENSG00000116809_ZBTB17	-6,13E-01	6,77E-03	2,25E-01
ENSG00000114770_ABCC5	3,84E-01	6,81E-03	2,25E-01
ENSG00000144959_NCEH1	4,20E-01	6,82E-03	2,25E-01
ENSG00000122218_COPA	2,49E-01	6,83E-03	2,25E-01
ENSG00000131746_TNS4	-2,84E-01	6,85E-03	2,25E-01
ENSG00000168237_GLYCTK	6,52E-01	6,86E-03	2,25E-01
ENSG00000225697_SLC26A6	6,43E-01	6,90E-03	2,25E-01
ENSG00000080845_DLGAP4	-4,47E-01	6,91E-03	2,25E-01
ENSG00000155749_ALS2CR12	-3,84E+00	6,92E-03	2,25E-01
ENSG00000273340_MICE	-3,84E+00	6,92E-03	2,25E-01
ENSG00000259589_AC073167.1	-3,84E+00	6,92E-03	2,25E-01
ENSG00000262228_AC087392.3	-3,84E+00	6,92E-03	2,25E-01
ENSG00000278963_AC005921.3	-3,84E+00	6,92E-03	2,25E-01
ENSG00000102109_PCSK1N	-3,84E+00	6,92E-03	2,25E-01
ENSG00000271218_AL033384.2	-3,84E+00	6,92E-03	2,25E-01
ENSG00000270019_AC110769.2	-3,84E+00	6,92E-03	2,25E-01
ENSG00000275468_AC004678.1	-3,84E+00	6,92E-03	2,25E-01
ENSG00000188505_NCCRP1	-3,84E+00	6,92E-03	2,25E-01
ENSG00000247570_SDCBPP2	-3,84E+00	6,92E-03	2,25E-01
ENSG00000273576_AC009283.1	-3,84E+00	6,92E-03	2,25E-01
ENSG00000135776_ABCB10	4,66E-01	6,97E-03	2,25E-01
ENSG00000186166_CCDC84	-7,42E-01	6,98E-03	2,25E-01
ENSG00000105879_CBLL1	-4,27E-01	7,01E-03	2,25E-01
ENSG00000142149_HUNK	-3,13E+00	7,02E-03	2,25E-01
ENSG00000261235_AC092142.1	-3,13E+00	7,02E-03	2,25E-01
ENSG00000278637_HIST1H4A	-3,13E+00	7,02E-03	2,25E-01
ENSG00000254369_HOXA-AS3	-3,13E+00	7,02E-03	2,25E-01
ENSG00000117586_TNFSF4	-3,13E+00	7,02E-03	2,25E-01
ENSG00000282021_AC100810.3	-3,13E+00	7,02E-03	2,25E-01
ENSG00000264343_NOTCH2NLA	-3,13E+00	7,02E-03	2,25E-01
ENSG00000256453_DND1	-3,13E+00	7,02E-03	2,25E-01
ENSG00000184743_ATL3	-4,42E-01	7,06E-03	2,26E-01
ENSG00000138796_HADH	3,43E-01	7,07E-03	2,26E-01
ENSG00000161996_WDR90	5,61E-01	7,07E-03	2,26E-01
ENSG00000149328_GLB1L2	2,95E-01	7,07E-03	2,26E-01
ENSG00000182934_SRPRA	2,78E-01	7,11E-03	2,26E-01
ENSG00000116212_LRRC42	5,94E-01	7,11E-03	2,26E-01
ENSG00000178209_PLEC	-1,98E-01	7,11E-03	2,26E-01
ENSG00000161714_PLCD3	2,33E-01	7,11E-03	2,26E-01
ENSG00000185453_ZSWIM9	-5,97E-01	7,13E-03	2,26E-01
ENSG00000148053_NTRK2	-9,50E-01	7,15E-03	2,26E-01
ENSG00000117640_MTFR1L	7,69E-01	7,16E-03	2,26E-01
ENSG00000185088_RPS27L	5,89E-01	7,21E-03	2,27E-01
ENSG00000110060_PUS3	-5,84E-01	7,22E-03	2,27E-01
ENSG00000198074_AKR1B10	1,37E-01	7,22E-03	2,27E-01
ENSG00000196236_XPNPEP3	-4,70E-01	7,23E-03	2,27E-01
ENSG00000080802_CNOT4	-5,68E-01	7,23E-03	2,27E-01
ENSG00000166575_TMEM135	4,34E-01	7,25E-03	2,27E-01
ENSG00000105552_BCAT2	4,81E-01	7,26E-03	2,27E-01
ENSG00000100241_SBF1	3,10E-01	7,27E-03	2,27E-01
ENSG00000099937_SERPIND1	-2,06E+00	7,34E-03	2,28E-01
ENSG00000138095_LRPPRC	2,06E-01	7,34E-03	2,28E-01
ENSG00000145675_PIK3R1	-3,76E-01	7,35E-03	2,28E-01
ENSG00000134852_CLOCK	-3,29E-01	7,36E-03	2,28E-01
ENSG00000129566_TEP1	5,00E-01	7,36E-03	2,28E-01
ENSG00000115271_GCA	7,30E-01	7,38E-03	2,28E-01
ENSG00000126001_CEP250	-4,54E-01	7,38E-03	2,28E-01
ENSG00000172893_DHCR7	3,54E-01	7,39E-03	2,28E-01
ENSG00000087302_RTRAF	-3,62E-01	7,39E-03	2,28E-01
ENSG00000164266_SPINK1	8,57E-01	7,40E-03	2,28E-01
ENSG00000179958_DCTPP1	5,03E-01	7,44E-03	2,29E-01
ENSG00000126945_HNRNPH2	-3,19E-01	7,50E-03	2,31E-01
ENSG00000106443_PHF14	-3,08E-01	7,52E-03	2,31E-01
ENSG00000162878_PKDCC	5,42E-01	7,52E-03	2,31E-01
ENSG00000148296_SURF6	-3,13E-01	7,53E-03	2,31E-01
ENSG00000143753_DEGS1	7,73E-01	7,54E-03	2,31E-01
ENSG00000105705_SUGP1	-5,75E-01	7,61E-03	2,33E-01
ENSG00000125772_GPCPD1	5,20E-01	7,63E-03	2,33E-01
ENSG00000163931_TKT	1,63E-01	7,64E-03	2,33E-01
ENSG00000117153_KLHL12	-5,95E-01	7,69E-03	2,34E-01
ENSG00000105325_FZR1	5,49E-01	7,71E-03	2,35E-01
ENSG00000119283_TRIM67	-3,03E+00	7,73E-03	2,35E-01
ENSG00000182628_SKA2	-3,15E-01	7,78E-03	2,36E-01
ENSG00000126524_SBDS	-3,24E-01	7,83E-03	2,37E-01
ENSG00000124571_XPO5	2,47E-01	7,84E-03	2,37E-01
ENSG00000160180_TFF3	6,10E-01	7,84E-03	2,37E-01
ENSG00000205336_ADGRG1	2,89E-01	7,89E-03	2,38E-01
ENSG00000104783_KCNN4	3,63E-01	7,90E-03	2,38E-01
ENSG00000106771_TMEM245	2,67E-01	7,90E-03	2,38E-01
ENSG00000143368_SF3B4	-3,19E-01	7,92E-03	2,38E-01
ENSG00000104825_NFKBIB	-4,09E-01	7,97E-03	2,39E-01
ENSG00000108448_TRIM16L	3,14E-01	7,97E-03	2,39E-01
ENSG00000103257_SLC7A5	2,37E-01	7,99E-03	2,39E-01
ENSG00000171314_PGAM1	-4,53E-01	8,00E-03	2,39E-01
ENSG00000171497_PPID	-4,33E-01	8,01E-03	2,39E-01
ENSG00000228253_MT-ATP8	-6,51E-01	8,04E-03	2,40E-01
ENSG00000135119_RNFT2	-9,69E-01	8,04E-03	2,40E-01
ENSG00000173653_RCE1	6,37E-01	8,09E-03	2,40E-01
ENSG00000006607_FARP2	3,58E-01	8,09E-03	2,40E-01
ENSG00000151715_TMEM45B	2,45E-01	8,11E-03	2,41E-01
ENSG00000172366_MCRIP2	5,94E-01	8,12E-03	2,41E-01
ENSG00000177981_ASB8	8,25E-01	8,15E-03	2,41E-01
ENSG00000116353_MECR	7,15E-01	8,16E-03	2,41E-01
ENSG00000160862_AZGP1	-3,33E-01	8,20E-03	2,42E-01
ENSG00000177728_TMEM94	4,54E-01	8,25E-03	2,43E-01
ENSG00000138180_CEP55	-3,40E-01	8,30E-03	2,45E-01
ENSG00000025796_SEC63	-3,24E-01	8,36E-03	2,45E-01
ENSG00000116698_SMG7	-2,36E-01	8,36E-03	2,45E-01
ENSG00000088038_CNOT3	-3,41E-01	8,38E-03	2,45E-01
ENSG00000255274_SMIM35	-2,79E+00	8,38E-03	2,45E-01
ENSG00000237286_AC004906.1	-2,79E+00	8,38E-03	2,45E-01
ENSG00000242697_RPL5P12	-2,79E+00	8,38E-03	2,45E-01
ENSG00000155363_MOV10	6,89E-01	8,41E-03	2,45E-01
ENSG00000121766_ZCCHC17	-5,15E-01	8,43E-03	2,46E-01
ENSG00000106399_RPA3	6,95E-01	8,43E-03	2,46E-01
ENSG00000138433_CIR1	-4,92E-01	8,46E-03	2,46E-01
ENSG00000136271_DDX56	4,54E-01	8,53E-03	2,48E-01
ENSG00000119801_YPEL5	5,60E-01	8,55E-03	2,48E-01
ENSG00000109572_CLCN3	-2,96E-01	8,57E-03	2,48E-01
ENSG00000197728_RPS26	-3,33E-01	8,57E-03	2,48E-01
ENSG00000008323_PLEKHG6	3,78E-01	8,57E-03	2,48E-01
ENSG00000125651_GTF2F1	-3,80E-01	8,60E-03	2,48E-01
ENSG00000128692_EIF2S2P4	-1,68E+00	8,62E-03	2,49E-01
ENSG00000163683_SMIM14	2,91E-01	8,64E-03	2,49E-01
ENSG00000269982_AC018809.2	-2,35E+00	8,65E-03	2,49E-01
ENSG00000133639_BTG1	5,59E-01	8,67E-03	2,49E-01
ENSG00000103249_CLCN7	6,18E-01	8,67E-03	2,49E-01
ENSG00000077097_TOP2B	-2,73E-01	8,69E-03	2,49E-01
ENSG00000163050_COQ8A	3,19E-01	8,74E-03	2,50E-01
ENSG00000117362_APH1A	3,54E-01	8,76E-03	2,50E-01
ENSG00000108671_PSMD11	-3,57E-01	8,82E-03	2,51E-01
ENSG00000112306_RPS12	2,36E-01	8,82E-03	2,51E-01
ENSG00000105939_ZC3HAV1	-4,16E-01	8,82E-03	2,51E-01
ENSG00000070413_DGCR2	2,79E-01	8,82E-03	2,51E-01
ENSG00000179091_CYC1	2,64E-01	8,83E-03	2,51E-01
ENSG00000075785_RAB7A	-2,15E-01	8,86E-03	2,51E-01
ENSG00000013374_NUB1	-3,39E-01	8,87E-03	2,51E-01
ENSG00000173848_NET1	-2,54E-01	8,88E-03	2,51E-01
ENSG00000143549_TPM3	-1,60E-01	8,90E-03	2,52E-01
ENSG00000135549_PKIB	5,55E-01	8,95E-03	2,53E-01
ENSG00000107021_TBC1D13	5,00E-01	8,98E-03	2,53E-01
ENSG00000159363_ATP13A2	3,44E-01	8,99E-03	2,54E-01
ENSG00000188157_AGRN	2,53E-01	9,03E-03	2,54E-01
ENSG00000109065_NAT9	5,96E-01	9,05E-03	2,54E-01
ENSG00000275110_MIR6087	-2,31E+00	9,08E-03	2,55E-01
ENSG00000221539_SNORD99	-2,59E+00	9,09E-03	2,55E-01
ENSG00000108639_SYNGR2	2,31E-01	9,11E-03	2,55E-01
ENSG00000086758_HUWE1	-2,42E-01	9,11E-03	2,55E-01
ENSG00000117143_UAP1	3,33E-01	9,13E-03	2,55E-01
ENSG00000179271_GADD45GIP1	-4,45E-01	9,14E-03	2,55E-01
ENSG00000178882_RFLNA	4,88E-01	9,19E-03	2,56E-01
ENSG00000096696_DSP	-2,40E-01	9,20E-03	2,56E-01
ENSG00000173442_EHBP1L1	-3,95E-01	9,22E-03	2,57E-01
ENSG00000179886_TIGD5	6,86E-01	9,38E-03	2,61E-01
ENSG00000169894_MUC3A	-4,21E-01	9,40E-03	2,61E-01
ENSG00000124383_MPHOSPH10	-3,73E-01	9,42E-03	2,61E-01
ENSG00000147889_CDKN2A	-6,43E-01	9,42E-03	2,61E-01
ENSG00000152133_GPATCH11	-4,36E-01	9,42E-03	2,61E-01
ENSG00000049656_CLPTM1L	3,78E-01	9,44E-03	2,61E-01
ENSG00000165502_RPL36AL	-3,78E-01	9,44E-03	2,61E-01
ENSG00000100982_PCIF1	6,20E-01	9,46E-03	2,61E-01
ENSG00000166164_BRD7	-3,32E-01	9,52E-03	2,62E-01
ENSG00000213639_PPP1CB	2,35E-01	9,54E-03	2,62E-01
ENSG00000103415_HMOX2	-4,26E-01	9,62E-03	2,64E-01
ENSG00000102007_PLP2	-3,58E-01	9,63E-03	2,64E-01
ENSG00000171612_SLC25A33	7,34E-01	9,65E-03	2,64E-01
ENSG00000164687_FABP5	-3,78E-01	9,66E-03	2,64E-01
ENSG00000152700_SAR1B	4,85E-01	9,67E-03	2,64E-01
ENSG00000123989_CHPF	5,62E-01	9,73E-03	2,66E-01
ENSG00000180071_ANKRD18A	-6,34E-01	9,77E-03	2,66E-01
ENSG00000164190_NIPBL	-3,27E-01	9,78E-03	2,66E-01
ENSG00000197586_ENTPD6	4,01E-01	9,79E-03	2,66E-01
ENSG00000162910_MRPL55	7,83E-01	9,82E-03	2,67E-01
ENSG00000052126_PLEKHA5	-4,13E-01	9,99E-03	2,71E-01
